1           Consumption of a Western-style diet modulates the response of the  
2                                    murine gut microbiome to ciprofloxacin  
3

4           Damien J. Cabral<sup>1,2</sup>, Jenna I. Wurster<sup>1,3</sup>, Benjamin J. Korry<sup>1,4</sup>, Swathi Penumutthu<sup>1,5</sup>, Peter  
5                                    Belenky<sup>1\*</sup>  
6  
7

8           <sup>1</sup> Department of Molecular Microbiology and Immunology, Brown University, Providence, RI  
9           02906, USA

10           <sup>2</sup> Email: damien\_cabral@brown.edu

11           <sup>3</sup> Email: jenna\_wurster@brown.edu

12           <sup>4</sup> Email: benjamin\_korry@brown.edu

13           <sup>5</sup> Email: swathi\_penumutthu@brown.edu

14

15           \* Correspondence: peter\_belenky@brown.edu

16 **Abstract:**

17 **Background:** Dietary composition and antibiotic use are known to have major impacts on the  
18 structure and function of the gut microbiome. In turn, the dysbiosis caused by antibiotic treatment  
19 or consumption of diets low in microbiota-accessible carbohydrates (MACs) is associated with a  
20 number of acute or chronic co-morbidities in the host, such as obesity or opportunistic infections.  
21 Despite this, little research has been done to explore the role of host diet as a determinant of  
22 antibiotic-induced microbiome disruption.

23 **Results:** Here, we utilize a multi-omic approach to characterize the impact of Western-style diet  
24 consumption on ciprofloxacin-induced changes to gut microbiome community structure and  
25 transcriptional activity. We found that mice consuming a Western-style diet experienced a greater  
26 expansion of *Firmicutes* following ciprofloxacin treatment than those eating a control diet. At the  
27 transcriptional level, we found that ciprofloxacin induced a reduction in the abundance of TCA  
28 cycle transcripts on both diets, suggesting that carbon metabolism plays a key role in the response  
29 of the gut microbiome to this antibiotic. Despite this shared response, we observed extensive  
30 differences in the response of the microbiota to ciprofloxacin on each diet. In particular, at the  
31 whole-community level we detected an increase in starch degradation, glycolysis, and pyruvate  
32 fermentation following antibiotic treatment in mice on the Western diet, which we did not observe  
33 in mice on the control diet. Similarly, we observed diet-specific changes in the transcriptional  
34 activity of two important commensal bacteria, *Akkermansia muciniphila* and *Bacteroides*  
35 *thetaiotaomicron*, involving diverse cellular processes such as nutrient acquisition, stress  
36 responses, and capsular polysaccharide (CPS) biosynthesis.

37 **Conclusions:** Our findings build on recent work and demonstrates that host diet plays a key role  
38 in determining the extent of microbiome disruption induced by antibiotic treatment. Thus, future  
39 studies investigating the impact of antibiotics on the microbiota should consider the impact that  
40 dietary composition may have on the interpretation of results. In the long term, the relationship  
41 between diet and microbiome disruption may help to identify ways to reduce the incidence of  
42 dysbiosis following clinical therapy in humans.

43  
44 **Keywords:**

45 Diet, antibiotics, metagenomics, metatranscriptomics, dysbiosis

46

47 **Background:**

48           The gut microbiome includes the trillions of largely commensal bacteria, archaea, fungi,  
49 and viruses and their collective genetic material that inhabit the gastrointestinal tract [1-3]. These  
50 communities play an important role in numerous biological processes, such as digestion,  
51 neurological development, colonization resistance, and immune function [4-18]. However, the gut  
52 microbiome is exquisitely sensitive to perturbation and the disruption of microbial homeostasis,  
53 known as dysbiosis, can result in numerous harmful impacts to the host. In particular, broad-  
54 spectrum antibiotic use is known to have numerous detrimental impacts on the gut microbiota.  
55 Within hours of treatment, antibiotics induce dramatic reductions in both bacterial loads and  
56 diversity within the microbiome [19,20].

57           While compositional changes are typically transient and recover following the cessation of  
58 therapy, oftentimes the structure and diversity of the microbiota never return to their pre-treatment  
59 levels. These changes often result in dysbiosis and have numerous acute and chronic impacts on  
60 host health. In particular, dysbiosis may increase the risk of infection with opportunistic fungal  
61 and bacterial pathogens by reducing colonization resistance [1,5-7,21-25]. Most notably, broad-  
62 spectrum antibiotic treatment is known to be a major risk factor in *Clostridioides difficile* infection,  
63 which is responsible for approximately 29,000 deaths worldwide and 15,000 in the United States  
64 alone [21,23,26,27]. In addition to short-term complications such as pathogen blooms, persistent  
65 dysbiosis is correlated with a number of chronic conditions associated with considerable morbidity  
66 and mortality, such as asthma, obesity, and inflammatory bowel disease [5,8-10,13,15,17,18,28].

67           In addition to eliciting changes in community structure, antibiotic exposure also has a  
68 dramatic impact on the functional activity of the gut microbiome by altering the expression of key  
69 metabolic genes and the availability of carbohydrates within the gut [20]. Most notably,

70 amoxicillin treatment has been shown to increase the expression of glycoside hydrolases  
71 responsible for hydrolysis of polysaccharides, while simultaneously decreasing the abundance of  
72 transcripts encoding sugar phosphotransferase systems (PTS) responsible for uptake of simple  
73 sugars [20]. Reflecting these changes, amoxicillin also decreases the concentration of glucose  
74 within the ceca of mice [20]. Furthermore, dietary intervention experiments have demonstrated  
75 that the response of the microbiota to antibiotics can be impacted by nutrient modulation. For  
76 example, glucose supplementation reduces the absolute abundance of bacteria, particularly  
77 *Bacteroides thetaiotaomicron*, following amoxicillin treatment in mice [20]. Therefore, it is likely  
78 that host diet composition has a major impact on the response of these communities to perturbation.

79         It is also known that dietary composition has a profound impact on microbiome diversity  
80 and overall gut health [29-35]. Diets high in fat and simple sugars, typically referred to as  
81 “Western” diets, have been associated with a number of negative health states including obesity,  
82 diabetes, allergies, and inflammatory bowel disease [36-46]. Such diets have very low levels of  
83 microbiota-accessible carbohydrates (MACs), which are typically found in complex plant  
84 polysaccharides and are indigestible and unabsorbable by the host [40,44,47-49]. MACs are  
85 typically fermented by the colonic microbiota to produce short-chain fatty acids (SCFAs), which  
86 in turn play important roles in regulating energy homeostasis and inflammation within the host  
87 [40,45,50-55]. In addition to being associated with increased levels of SCFAs, high-MAC diets  
88 have been shown to increase microbial diversity, a classic benchmark for gut microbiota health.  
89 Conversely, low-MAC Western diets are known to reduce both microbiome diversity and SCFA  
90 production [44,46,49,56]. Due to the absence of MACs, such diets also enrich for muciniphilic  
91 microbes that may degrade mucosal lining of the gut, such as *Akkermansia muciniphila* [40,42,48].  
92 Degradation of the mucosal layer over time is hypothesized to result in compromised gut barrier

93 function that may ultimately lead to increased inflammation and colitis. Lastly, MAC-deficient  
94 diets have been shown to exacerbate infection with *C. difficile*, suggesting that they may negatively  
95 impact colonization resistance [26,27].

96 Individually, antibiotic usage and the consumption of Western-style diets are known to  
97 negatively impact the microbiota, resulting in similar long-term impacts on host health (including  
98 obesity, allergies, and inflammatory bowel disease). Despite this, little work has been done to  
99 explore how diet impacts the response of the microbiota to antibiotics. Previous work has  
100 suggested that dietary composition may play an important role in determining the extent of  
101 antibiotic-induced microbiome disruption [20]. In this study, we use a combined metagenomic and  
102 metatranscriptomic approach to characterize the impact of a Western-style diet on the taxonomic  
103 and functional disruption of the microbiome during ciprofloxacin treatment. Using shotgun  
104 metagenomics, we found that ciprofloxacin elicited differential impacts on community  
105 composition in mice at both the phylum- and species-level that were diet-dependent. Using  
106 metatranscriptomics, we observed that consumption of a Western diet itself induced profound  
107 transcriptional changes within the gut microbiomes of mice; furthermore, consumption of this diet  
108 modulated the transcriptional response of these communities to antibiotic treatment. In particular,  
109 dietary composition had a major impact on the abundance of transcripts encoding key metabolic  
110 genes. Notably, we also found that host diet composition had a differential impact on the  
111 expression of known virulence factors and antibiotic resistance genes (ARGs) within the  
112 microbiome, suggesting that diet may contribute to the expansion of pathogenic bacteria following  
113 treatment. Lastly, we were able to detect unique species-specific transcriptional changes in  
114 response to both diet and ciprofloxacin treatment in two important commensal bacteria, *A.*  
115 *muciniphila* and *B. thetaiotaomicron*. In addition to detecting changes reflective of ciprofloxacin's

116 primary mechanism of action as an inhibitor of DNA gyrase, we observed that antibiotic treatment  
117 impacted a number of diverse cellular processes involving capsular polysaccharide synthesis,  
118 stress responses, and nutrient acquisition, amongst others. Together, our findings build on previous  
119 literature that demonstrates that antibiotics have a differential impact on the structure and function  
120 of the gut microbiome that is dependent on host diet composition.

121 **Results:**

122 To determine the impact of dietary composition and antibiotic exposure on the structure  
123 and function of the murine gut microbiome, female C57BL/6J mice were fed either a high-fat,  
124 high-sugar “Western”-style diet, or a low-fat control diet for seven days. Mice were subsequently  
125 treated with a clinically relevant dosage of ciprofloxacin or a vehicle control for 24 hours. This  
126 time point was chosen because previously published work demonstrated that 24 hours of  
127 ciprofloxacin treatment was sufficient to induce changes in community structure and  
128 transcriptional activity [20]. Additionally, this time frame allowed us to profile the acute response  
129 of the microbiota to ciprofloxacin exposure, rather than characterizing a post-antibiotic state of  
130 equilibrium. Following treatment, the mice were sacrificed to harvest their cecal contents for  
131 metagenomic and metatranscriptomic analysis (Figure 1A). Overall, we found that diet and  
132 ciprofloxacin treatment had a significant impact on gut microbiome structure (Figure 1B+C).

133 Mice consuming the Western diet had significantly less diverse gut microbiomes than those  
134 fed the control diet (Figure 1B). In general, mice fed a Western diet displayed elevated levels of  
135 the phyla *Verrucomicrobia* and *Bacteroidetes*, and a reduced abundance of *Firmicutes* (Figure  
136 1C). At the species level, these shifts appear to be largely driven by an expansion of members of  
137 the *Bacteroides* genus (Figure 1D, Additional File 1). Additionally, the Western diet-fed mice  
138 displayed an elevated abundance of several species from the *Proteobacteria* phylum, which has  
139 been previously shown to be suggestive of dysbiosis [57]. Two important bacterial species found  
140 in the gut microbiomes of both mice and humans, *B. thetaiotaomicron* and *A. muciniphila*, were  
141 observed at significantly elevated levels in the mice fed a Western diet [20] (Figure 1F+G,  
142 Additional File 1). Notably, both species are known to utilize host-produced mucins; thus, this

143 observation is consistent with earlier studies that have suggested that the consumption of a low-  
144 MAC Western diet enriches for muciniphilic bacteria [40,42,48].

145 Overall, host diet appears to have a major impact on the structure on the microbiome during  
146 ciprofloxacin treatment. While ciprofloxacin did not induce a significant reduction in alpha  
147 diversity in the timeframe tested, at the phylum level we observed a significant expansion in the  
148 relative abundance of *Firmicutes* following ciprofloxacin treatment on the Western diet (adjusted  
149 p-value = 0.0388) but not on the control diet (adjusted p-value = 0.8718) (Figure 1C). To determine  
150 which species displayed a differential response to ciprofloxacin on the Western and control diets,  
151 we utilized DESeq2 to analyze the interaction between diet and antibiotic treatment [58]. An  
152 interaction term describes the direction and magnitude of the differential impact that host diet has  
153 on antibiotic perturbation within the microbiome. For example, ciprofloxacin reduces the  
154 abundance of *Clostridium innocuum* on the control diet, while it expands following treatment on  
155 the Western diet (Figure 1E, Additional File 1); thus, the interaction term in this case is positive,  
156 as it indicates an expansion on the Western diet relative to control following ciprofloxacin  
157 exposure.

158 While most species responded similarly to ciprofloxacin therapy on both diets, there were  
159 several notable exceptions. For example, the expansion of several *Clostridium* species (such as *C.*  
160 *innocuum*, *Clostridium beijerinckii*, and *Clostridium scindens*) following ciprofloxacin tended to  
161 be higher on the Western diet than the control (denoted by a positive interaction value in Figure  
162 1E, Additional File 1). Conversely, the reduction of several *Bacteroides* species following  
163 antibiotic treatment tended to be exacerbated on the Western diet (negative interaction values,  
164 Figure 1E, Additional File 1). In particular, the reduction of *B. thetaiotaomicron* in response to  
165 ciprofloxacin was enhanced on the Western diet; in contrast, dietary composition had no



166 significant impact on the response of *A. muciniphila* to ciprofloxacin (Figure 1F+G, Additional  
167 File 1). Lastly, Western diet consumption appeared to have the most detrimental impact on *Blautia*  
168 sp. YL58 during ciprofloxacin therapy, as evidenced by its large, negative interaction term (Figure  
169 1H, Additional File 1). While ciprofloxacin did not significantly reduce the abundance of *Blautia*  
170 sp. YL58 in mice consuming the control diet, this bacterium was completely undetectable  
171 following treatment on the Western diet. This is particularly notable because this species was  
172 present in comparable levels in vehicle-treated animals on both the Western and control diets  
173 (Figure 1H, Additional File 1).

174

### 175 **Ciprofloxacin Elicits Unique Shifts in Gene Expression on Western and Control Diets**

176         Though many studies have examined the impacts of either diet or antibiotic treatment on  
177 the gut microbiome, few have examined their combined effect on the composition or gene  
178 expression of these communities. To address this, we first analyzed our metatranscriptomic dataset  
179 using the HUMAnN2 pipeline, which normalizes the abundance of RNA transcripts against their  
180 corresponding gene abundance in the metagenomic data [59]. Thus, this tool normalizes for  
181 differences in community composition between experimental groups and facilitates the  
182 comparison of metabolic pathway expression at the whole-community level. A comparison of the  
183 transcriptional profile of all experimental groups demonstrates that the microbiota of mice  
184 consuming the Western diet display elevated expression of tricarboxylic acid (TCA) cycle and  
185 fatty acid degradation pathways in both vehicle and ciprofloxacin treatments, likely reflective of  
186 the increased fat and sugar content of this diet (Figure 2A, Additional File 2). Additionally, we  
187 found an elevated expression of glycogen degradation genes in the Western diet mice receiving  
188 ciprofloxacin, which was not observed in any other group (Figure 2A, Additional File 2).

189 Conversely, the microbiota of mice consuming the control diet appeared to have elevated  
190 expression of amino acid biosynthesis pathways (namely isoleucine, aspartate, asparagine, lysine,  
191 and histidine) regardless of antibiotic treatment (Figure 2A, Additional File 2). Interestingly, we  
192 also observed elevated levels of several different pathways of nucleotide biosynthesis in the control  
193 diet samples receiving vehicle while the Western diet mice displayed elevated levels of adenosine  
194 and guanosine nucleotide degradation (Figure 2A, Additional File 2).

195 A pairwise comparison between the vehicle-treated samples on the Western and control  
196 diets reveals that the microbiota exhibits extensive transcriptional changes in response to dietary  
197 modulation (Figure 2B, Additional File 2). Notably, the microbiota on the control diet-fed mice  
198 displayed elevated expression of nucleotide biosynthesis, glycolysis, gluconeogenesis, starch  
199 degradation, and pyruvate fermentation (Figure 2A+B, Additional File 2). We also observed  
200 increased expression of the *Bifidobacterium* shunt, which is known to play a role in SCFA  
201 production and may provide mechanistic insight into the the reduced SCFA levels observed on the  
202 Western diet in other studies [40,51] (Figure 2B, Additional File 2).

203 When we compared the response of the microbiome to ciprofloxacin on each diet, we found  
204 key differences in the overall transcriptional profiles (Figure 2C+D, Additional File 2). In mice  
205 consuming the Western diet, ciprofloxacin treatment was associated with increased abundance of  
206 transcripts from glycogen and starch degradation, glycolysis, and pyruvate fermentation (Figure  
207 2C, Additional File 2). Notably, the expression of glycogen degradation was elevated in vehicle-  
208 treated samples on the control diet, suggesting that the utilization of this pathway during  
209 ciprofloxacin treatment is diet-dependent (Figure 2D, Additional File 2). On the control diet, we  
210 observed an increased abundance of inosine-5-phosphate biosynthesis with ciprofloxacin  
211 treatment (Figure 2A+D, Additional File 2). Interestingly, we observed that TCA cycle expression

212 was reduced in ciprofloxacin-treated mice compared to the vehicle treatment in both control and  
213 Western diet conditions – the lone commonality between diets (Figure 2C+D, Additional File 2).  
214 Previous work has demonstrated that elevated TCA cycle activity increases sensitivity to  
215 bactericidal antibiotics, including fluoroquinolones, *in vitro* [60-64]. Thus, this result suggests that  
216 TCA cycle activity may play a key role in the response of the microbiota to ciprofloxacin treatment  
217 *in vivo*, though more work is required to understand its impact.

218

219 **Ciprofloxacin has a differential impact on the abundance of iron metabolism and mucin**  
220 **degradation transcripts on the Western versus control diets**

221 Due to the potential limitations of the use of a single pipeline, we analyzed our  
222 metatranscriptomic dataset with SAMSA2 in parallel with HUMAnN2. While HUMAnN2  
223 normalizes for DNA abundance, SAMSA2 does not have this feature and thus the output is  
224 representative of overall transcript levels rather than relative expression. Despite these differences,  
225 many of the changes observed using HUMAnN2 were detected using SAMSA2 at the SEED  
226 subsystem level. When comparing the vehicle-treated samples on both diets, SAMSA2 detected  
227 an increased abundance of transcripts related to respiration in the Western diet, mirroring the  
228 increase in TCA cycle expression found with HUMAnN2 (Figure 3A, Additional File 3). The  
229 microbiota from the Western diet-fed mice also displayed an increased abundance of transcripts  
230 involving fatty acids and iron acquisition, which likely reflect altered nutrient availability (Figure  
231 3A, Additional File 3). Furthermore, transcripts related to virulence and disease were elevated in  
232 mice consuming the Western diet, further supporting the hypothesis that consumption of a Western  
233 diet may promote dysbiosis and the expansion of enteric pathogens (Figure 3A, Additional File 3).  
234 Interestingly, comparatively few subsystems were changed in abundance following ciprofloxacin

235 treatment on either diet (Figure 3B+C, Additional File 3). Most notably, we observed a decrease  
236 in transcripts related to dormancy and sporulation in response to ciprofloxacin on both diets  
237 (Figure 3B+C, Additional File 3). A similar finding was observed in a recent study in which mice  
238 were treated with ciprofloxacin while consuming a non-purified diet, suggesting that these  
239 transcripts may play a key role in the response of the microbiota to this antibiotic [20].

240 An additional strength of the SAMSA2 pipeline is that it enables differential abundance  
241 testing of individual transcripts in addition to pathway- and subsystem-level analysis [65]. We  
242 observed that the microbiota of the mice consuming the Western diet displayed increased  
243 abundance of heme b synthase transcripts, which may suggest increased iron acquisition (Figure  
244 3D, Additional File 4). Interestingly, in the untreated mice, we detected large, Western diet-  
245 associated increases in the abundance of two different transcripts encoding sialidases, which play  
246 a key role in the utilization of host-produced mucins [66] (Figure 3D, Additional File 4) . While  
247 other studies have shown that the consumption of a Western diet enriches for muciniphilic taxa,  
248 this observation demonstrates that such a diet also increases transcriptional activity related to  
249 mucin degradation within the microbiome [40,42]. Furthermore, ciprofloxacin increased the  
250 abundance of sialidase transcripts in mice on the control diet, suggesting that this effect may be  
251 exacerbated by antibiotic treatment (Figure 3E, Additional File 4).

252 In addition to the increased abundance of sialidase transcripts, ciprofloxacin induced a  
253 number of notable transcriptional changes on each diet. Reflecting the overall reduction in  
254 sporulation seen at the subsystem level, we found that the abundance of several sporulation-related  
255 transcripts were reduced on the control diet following ciprofloxacin treatment (Figure 3E,  
256 Additional File 4). Additionally, we detected an increased abundance of transcripts related to  
257 glycoside hydrolase family 98 (GH98; Figure 3E, Additional File 4) on the control but not the

258 Western diet. This family of glycoside hydrolases is known to include endo-beta-galactosidase, an  
259 enzyme that cleaves AB blood group surface antigens and has been shown to play a role in the  
260 virulence of organisms such as *Clostridium perfringens* and *Streptococcus pneumoniae* [67]. On  
261 the Western diet, we observed that ciprofloxacin treatment reduced the abundance of transcripts  
262 encoding a cluster of sulfate reductases, which may indicate a broader role for these enzymes  
263 during antibiotic treatment. Among the transcripts that were increased in abundance on this diet  
264 were several that encoded flagellin and related proteins, which can play a role in pathogenicity  
265 [68,69] (Figure 3F, Additional File 4). Additionally, we found increases in transcript levels of  
266 several phage-related genes, which has been observed previously in response to ciprofloxacin  
267 treatment [20] (Figure 3F, Additional File 4).

268 Lastly, we examined the interaction of diet and antibiotic treatment on transcript abundance  
269 within the microbiome. Notably, we found that the transcript abundance of several sporulation  
270 genes following ciprofloxacin treatment was significantly higher on the Western diet than the  
271 control (Figure 3G, Additional File 4). Additionally, transcripts encoding phosphotransferase  
272 system (PTS) transporters of various substrates (such as cellobiose, fructose, and N-  
273 acetylgalactosamine) were also found to be higher on the Western diet following ciprofloxacin  
274 treatment (Figure 3G, Additional File 4). Conversely, consumption of the Western diet  
275 significantly reduced the change in transcript abundance of both pectate lyase and a hemin receptor  
276 following ciprofloxacin therapy. Together, these findings demonstrate that dietary composition  
277 significantly impacts the transcriptional response of the microbiome to ciprofloxacin.

278

279 **Host diet has a major impact on the transcript abundance of antibiotic resistance and**  
280 **virulence factor genes**

281 Previous work has suggested that dietary composition may promote the virulence of several  
282 known bacterial pathogens [20,70-73]. Furthermore, the emergence of antibiotic resistance genes  
283 (ARGs) during clinical therapy threatens the efficacy of many drugs [74]. Therefore, we sought to  
284 profile the impact of diet and ciprofloxacin treatment on the abundance of known ARG and  
285 virulence factor transcripts within the microbiome. Overall, diet appeared to have the most  
286 dramatic impact on the abundance of ARG transcripts at the class level (Figure 4A, Additional  
287 File 5). The microbiota of mice consuming the Western diet had an elevated abundance of ARG  
288 transcripts against fosmidomycin, beta-lactam, glycopeptide and peptide antibiotics (Figure 4A,  
289 Additional File 5). The observed increase in glycopeptide ARGs appears be driven primarily by  
290 increased transcript levels of four genes that confer resistance to vancomycin (*vanG*, *vanN*, *vanE*,  
291 and *vanL*, Additional File 6). Conversely, Western diet-fed mice also exhibited decreased  
292 abundances of transcripts encoding ARGs against tetracycline, mupirocin, bacitracin, and phenicol  
293 antibiotics (Figure 4A, Additional File 5).

294 Interestingly, ciprofloxacin treatment did not elicit major shifts in class-level ARG  
295 transcript abundance on either diet. On the Western diet, we observed statistically significant  
296 changes in two ARG classes (an increase in oxazolidinone and a decrease in unclassified ARGs)  
297 while ciprofloxacin only changed the abundance of a single class on the control diet (an increase  
298 in beta-lactam ARGs). However, ciprofloxacin did elicit numerous changes in the transcript  
299 abundance of several individual ARGs on both diets (Additional File 6). On the Western diet,  
300 ciprofloxacin increased the abundance of transcripts encoding three tetracycline resistance genes  
301 (*tetB*(60), *tetB*(46), and *otrA*) while decreasing expression of several efflux pumps (*mefA*, *mexW*,  
302 *mexB*, and *oprA*). Interestingly, several of the transcripts encoding efflux pumps that were reduced  
303 with ciprofloxacin treatment on the Western diet were increased on the control diet (*mexW*, *mefA*)

304 along with several other ARGs from this class (*mexQ*, *mexF*). Together, these findings suggest  
305 that host diet influences the abundance of resistance genes during antibiotic therapy. Additionally,  
306 it appears that ciprofloxacin treatment has a comparatively minor impact on the abundance of ARG  
307 transcripts within the microbiota relative to host diet. It is important to note that this analytical  
308 pipeline does not account for changes in population structure induced by each of the perturbations.  
309 As a result, some of the discussed changes in transcript abundance may result from differential  
310 bacterial abundances. For example, the Western diet induced an expansion in *B. thetaiotaomicron*,  
311 a bacterium that typically encodes beta-lactamases [20,75-79]. Thus, this may partially explain the  
312 higher observed levels of beta-lactam resistance in this condition.

313         Diet and ciprofloxacin treatment also had a major impact on the abundance of transcripts  
314 encoding known virulence factors. In total, we detected 351 virulence factor transcripts with  
315 altered abundances on the Western diet (Additional File 7). Supporting our earlier observation  
316 (Figure 3D, Additional File 7), we found that the microbiota of the mice consuming the Western  
317 diet displayed an increased transcript abundance of numerous enzymes known to hydrolyze host-  
318 derived proteins – specifically, hyaluronidase, neuraminidase, sialidase, and exo-alpha-sialidase  
319 (Figure 4B, Additional File 7). Additionally, mice consuming a Western diet displayed higher  
320 transcript abundances of catalase and superoxide dismutase, which may be indicative of oxidative  
321 stress (Figure 4B, Additional File 7). In total, ciprofloxacin treatment altered the abundance of 139  
322 and 90 virulence factor transcripts on the control and Western diets, respectively (Figures 4C+D,  
323 Additional File 7). Of note on the control diet, ciprofloxacin increased the abundance of transcripts  
324 of sialidase, catalase, a glucose/galactose transporter, and the outer membrane protein OmpA while  
325 simultaneously reducing the abundance of transcripts related to urease, iron permease, ferric  
326 siderophores, bile salt hydrolase, and twitching motility (Figure 4C, Additional File 7). On the

327 Western diet, ciprofloxacin increased the transcript abundance of several iron-related virulence  
328 factors such as an iron-regulated transporter, hemolysin B, and a hemolysin transport protein  
329 (Figure 4D, Additional File 7). Lastly, we examined the interaction of both diet and ciprofloxacin  
330 treatment on the abundance of transcripts encoding virulence factors (Figure 4E, Additional File  
331 7). Interestingly, we observed that the change in transcript abundance of catalase, superoxide  
332 dismutase, hyaluronidase, sialidase, and exo-alpha-sialidase following ciprofloxacin  
333 administration were all significantly lower on the Western diet relative to the control (Figure 4E,  
334 Additional File 7). However, we previously observed that the baseline levels of these transcripts  
335 were significantly elevated in the Western diet before treatment (Figure 4B, Additional File 7).  
336 Therefore, it is likely that the reduced expansion of these transcripts following ciprofloxacin  
337 treatment on the Western diet is attributable to their high, pre-treatment baseline levels.

338

### 339 **Diet and ciprofloxacin alter gene expression within *B. thetaiotaomicron* and *A. muciniphila***

340 All metatranscriptomic analysis conducted thus far has examined the impact of diet and  
341 ciprofloxacin treatment on the transcriptional activity of the microbiome at the whole community  
342 level. However, we sought to profile how these factors impacted individual species within the  
343 microbiota. Thus, we used a previously published pipeline to interrogate the impact of diet and  
344 antibiotic treatment on two individual species: *B. thetaiotaomicron* and *A. muciniphila* [20,80].  
345 We focused on these bacteria because they are known human gut commensals, were found in  
346 relatively high levels in all samples analyzed, and because they were differentially abundant in a  
347 diet-dependent manner.

348 Interestingly, we found that *A. muciniphila* displayed increased expression of several  
349 known stress response genes on the Western diet (Figure 5A, Additional File 8). Specifically, we



350 observed elevated levels of transcripts for catalase HP11 (AMUC\_RS11055), ATP-dependent  
351 chaperone ClpB (AMUC\_RS04500), a universal stress protein (AMUC\_RS00415), superoxide  
352 dismutase (AMUC\_RS08510), a UvrB/UvrC protein (AMUC\_RS00335), and a thioredoxin  
353 family protein (AMUC\_RS11695). Together, these changes may indicate that Western diet  
354 consumption induces a general stress response in *A. muciniphila*. Additionally, we observed  
355 numerous changes within respiratory and central carbon metabolism, suggesting broad metabolic  
356 changes in response to the Western diet (Figure 5A, Additional File 8). We specifically detected  
357 increased expression of genes encoding terminal oxidases of the respiratory chain  
358 (AMUC\_RS09050 - cytochrome ubiquinol oxidase subunit I and AMUC\_RS09045 - cytochrome  
359 d ubiquinol oxidase subunit II), the TCA cycle (AMUC\_RS09040 - 2-oxoglutarate dehydrogenase  
360 E1 component), glycolysis (AMUC\_RS06320 - phosphopyruvate hydratase, AMUC\_RS02385 -  
361 pyruvate kinase), and pyruvate metabolism (AMUC\_RS01195 - ubiquinone-dependent pyruvate  
362 dehydrogenase). Of the genes that were significantly reduced on the Western diet, the most notable  
363 were an adenylysuccinate synthase (AMUC\_RS11340) and a lyase (AMUC\_RS10360), which both  
364 play important roles in purine metabolism (Figure 5A, Additional File 8) [81].

365 In comparison to diet, ciprofloxacin treatment had a relatively minor impact on *A.*  
366 *muciniphila* gene expression (Additional File 8). In total, ciprofloxacin significantly altered the  
367 expression of 14 and 26 genes on the control and Western diets, respectively (Additional File 8).  
368 On the control diet, *A. muciniphila* increased the expression of the molecular chaperone protein  
369 DnaK, which is known to play a role in stress responses [82-84]. Additionally, we observed  
370 elevated expression of a MoxR family ATPase following ciprofloxacin treatment on this diet.  
371 Though these proteins are poorly characterized, other members of this family have been shown to  
372 regulate stress responses in other bacteria [85]. On the Western diet, several genes related to

373 tryptophan biosynthesis and metabolism were elevated following ciprofloxacin treatment  
374 (AMUC\_RS08210 - tryptophan synthase subunit beta, AMUC\_RS08190 - anthranilate synthase  
375 component I family protein, AMUC\_RS08215 - tryptophan synthase subunit alpha); however,  
376 their biological significance is unclear at this time (Additional File 8). Lastly, an examination of  
377 the interaction between diet and ciprofloxacin treatment indicated that only six genes (two of  
378 which encoded tRNAs) were significantly altered, suggesting that diet does not have a major  
379 impact on the response of this bacterium to ciprofloxacin within the microbiome (Additional File  
380 8).

381         In contrast to *A. muciniphila*, diet had a relatively minor impact on *B. thetaiotaomicron*  
382 gene expression while ciprofloxacin induced extensive changes. In total, *B. thetaiotaomicron*  
383 altered the expression of 74 genes in response to Western diet consumption (Additional File 9). Of  
384 note, this diet increased the expression of an aminoglycoside efflux pump (BT\_0305), the universal  
385 stress protein UspA (BT\_0901), and a hemin receptor (BT\_0316). However, more than half of the  
386 genes (52.7%) that changed in response to diet are of unknown function and are classified as  
387 “hypothetical proteins;” thus, it is difficult to draw conclusions without improved annotation.  
388 Overall, ciprofloxacin appeared to induce extensive transcriptional changes within *B.*  
389 *thetaiotaomicron* regardless of diet. On the control diet, we observed an increased abundance of  
390 transcripts encoding a number of proteins involved in capsular polysaccharide (CPS) biosynthesis  
391 and export (Figure 5B, Additional File 9). Within *B. thetaiotaomicron*, CPS production is encoded  
392 by a total of 182 genes distributed among eight loci (typically termed *cps1-8*) [86,87]. It is  
393 hypothesized that an individual bacterium expresses one of these CPS configurations at any given  
394 time and that these structures play key roles in processes such as nutrient acquisition and immune  
395 evasion [87]. Additionally, the two genes with the greatest increase in expression during

396 ciprofloxacin treatment encoded UDP-glucose 6-dehydrogenase, which plays a key role in the  
397 biosynthesis of glycan precursors that are essential for capsule production in other bacteria [88-  
398 90]. Together, these findings may suggest a role for CPS state as a determinant of ciprofloxacin  
399 susceptibility *in vivo*.

400         On the Western diet, ciprofloxacin elicited profound changes in transcriptional activity,  
401 altering the expression of 442 different genes (Figure 5C, Additional File 9). Interestingly, *B.*  
402 *thetaitoaomicron* reduced the expression of a number of genes involved in the utilization of host-  
403 derived carbohydrates (sialic acid-specific 9-O-acetyltransferase, endo-beta-N-  
404 acetylglucosaminidase F1, beta-hexosaminidase) and stress responses (universal stress protein  
405 UspA, thioredoxin), mirroring the changes we saw at the whole-community level (Figure 5C,  
406 Additional File 9). Conversely, we observed increased expression of several genes that encode  
407 molecular chaperones (such as GroEL and GroES) or are involved in DNA replication or damage  
408 repair (such as a DNA helicase, DNA gyrase subunit B, DNA mismatch repair protein MutS, DNA  
409 polymerase III subunit alpha, Holliday junction DNA helicase RuvB, DNA-binding proteins, and  
410 DNA primase) (Figure 5C, Additional File 9). Ciprofloxacin, a fluoroquinolone class  
411 antimicrobial, triggers DNA damage via inhibition of DNA gyrase and topoisomerase IV. Thus,  
412 these changes in gene expression may be reflective of the primary mechanism of action of this  
413 antibiotic and are consistent with previously published data [20]. Furthermore, our ability to detect  
414 such changes is an important indication that our analysis is detecting ciprofloxacin-induced  
415 transcriptional shifts. Lastly, diet appears to have a significant impact on ciprofloxacin-induced  
416 transcriptional changes within *B. thetaitoaomicron*, modulating the response of 148 genes  
417 (Additional File 9). Of note, Western diet consumption in the context of ciprofloxacin treatment  
418 had a negative impact on several genes involved in the acquisition of nutrients, such as vitamin

419 B<sub>12</sub> and hemin receptors, and transporters of glucose/galactose, hexuronate, arabinose, and Na<sup>+</sup>  
420 (Additional File 9). Thus, it is likely that the availability of nutrients within the gut plays a role in  
421 the response of these bacteria to antibiotics.

422 **Discussion:**

423           Previous work has demonstrated that host diet, particularly with respect to sugar and fiber  
424 content, plays a major role in the extent of antibiotic-induced microbiome disruption [20]. In  
425 Western societies, many people consume a diet high in added sugars and fat, but low in host-  
426 indigestible fiber. It is thought that such a composition promotes the development of metabolic  
427 syndrome, heart disease, diabetes, and a number of other chronic conditions [36-46]. Furthermore,  
428 broad-spectrum antibiotic use and resulting microbiome dysbiosis have been associated with a  
429 number of similar co-morbidities along with increased susceptibility to opportunistic infections  
430 [1,5-7,21-23,25,26]. Despite this connection, little work has been done examining how host dietary  
431 composition impacts the response of the microbiota to antibiotic perturbation. It is known that  
432 nutrient availability and metabolic state are a major determinant of antibiotic susceptibility of  
433 bacteria *in vitro* [20,60-63,91-97]. Thus, it is likely that modulating host diet, thus changing the  
434 availability of nutrients to the microbiota, would alter the sensitivity of bacteria in these  
435 communities to antibiotic therapy.

436           To address this knowledge gap, we utilized a combined metagenomic and  
437 metatranscriptomic approach to profile taxonomic and functional changes in response to both diet  
438 and antibiotic treatment. By utilizing these tools in parallel, we are able to link transcriptional  
439 changes to observed shifts in community structure on each diet. Using metagenomics, we observed  
440 that ciprofloxacin had a differential impact on community composition that was diet-dependent.  
441 Specifically, we observed a statistically significant expansion of the *Firmicutes* phylum following  
442 ciprofloxacin treatment on the Western, but not control, diet. Using metatranscriptomics, we  
443 observed that ciprofloxacin treatment resulted in a decreased abundance of transcripts from the  
444 TCA cycle in both diets, suggesting that this response is diet-independent. Furthermore, this

445 observation is consistent with previous *in vitro* findings that demonstrate a key role for bacterial  
446 respiration as a determinant of susceptibility to fluoroquinolones [60-62,64,91,94]. Conversely,  
447 ciprofloxacin had diverging impacts on the abundance of various iron and mucin utilization  
448 transcripts on the Western and control diets. Most notably, we found that Western diet  
449 consumption (alone and in the presence of ciprofloxacin) influenced the abundance of transcripts  
450 encoding known virulence and antibiotic resistance genes, supporting previous literature  
451 demonstrating that nutrient availability impacts virulence of enteric pathogens [20,71,98-100].  
452 Lastly, we detected species-specific transcriptional changes in two important commensal bacteria,  
453 *B. thetaiotaomicron* and *A. muciniphila*. In addition to detecting changes in transcript levels that  
454 were reflective of stress responses, we also observed that transcripts involved in diverse cellular  
455 processes such as nutrient acquisition, carbon metabolism, and capsular polysaccharide (CPS)  
456 biosynthesis were differentially expressed as well.

457         Despite the advantages of a multi-omic approach, there are a number of drawbacks to these  
458 techniques that complicate the interpretation of our results. Most crucially, nearly all analytical  
459 pipelines used to analyze microbiome data are reliant on existing databases that are largely  
460 incomplete. It is hypothesized that approximately half of all genes within the human gut  
461 microbiome have no functional annotation [101]. Thus, the ability to accurately profile the  
462 transcriptional activity of these communities is inherently limited by the quality and completeness  
463 of the databases utilized. Additionally, elucidating the biological significance of taxonomic of  
464 functional changes is often difficult in many microbiome analyses. Due to the complex nature of  
465 these communities, it is often difficult to ascertain if the observed transcriptional changes are the  
466 result of the direct action of the antibiotic, or the indirect effect of changes in host physiology,  
467 nutrient availability, or the disruption of ecological networks within the microbiome. For example,

468 our transcriptional analysis of *B. thetaiotaomicron* showed that this bacterium differentially  
469 expressed receptors for both hemin and vitamin B<sub>12</sub>, which may suggest that these nutrients play  
470 a role in ciprofloxacin toxicity. Alternatively, it is possible that these transcriptional changes are  
471 reflective of increased availability of these nutrients due to decreased competition from other  
472 members of the microbiota (though these hypotheses are not mutually exclusive). Additionally, it  
473 is possible that dietary composition could play a significant role in antibiotic absorption or  
474 sequestration in the gut, which in turn would impact the extent of the damage caused to the  
475 microbiota.

476 This study builds on recent work that demonstrates that the availability of metabolites to  
477 the bacteria in the host plays an important role in determining the extent of antibiotic-induced  
478 microbiome disruption [20]. Taken together, these results demonstrate the need to consider dietary  
479 composition in the design and interpretation of experiments focused on understanding the impact  
480 of antibiotics on the microbiota. Previous studies have demonstrated that dietary changes induce  
481 rapid shifts in gut microbiome composition [32,34,43,56,102-105]. Therefore, in the long-term,  
482 dietary modulation could represent an attractive strategy to reduce the collateral damage to  
483 commensal bacteria and the resulting complications from dysbiosis caused by clinical therapy.  
484 Despite these promising applications, considerable work is required before these findings have  
485 direct clinical relevance. In particular, the considerable differences in physiology, microbiome  
486 composition, and diet between humans and rodents complicate the direct clinical relevance of these  
487 findings. Furthermore, it is unclear which components of diet are responsible for the observed  
488 effects and whether short-term dietary modulation has any long-term consequences on either the  
489 host or the microbiome. Thus, additional research is warranted to fully elucidate how host diet  
490 impacts antibiotic-induced microbiome disruption in humans.

491

492 **Conclusions:**

493       Using a combined metagenomic and metatranscriptomic approach, we demonstrate that  
494 murine diet composition has a major impact on the response of the murine gut microbiome to  
495 ciprofloxacin therapy. First, we found that the gut microbiome undergoes differential shifts in  
496 community structure in response to antibiotic treatment in a diet-dependent manner. At the  
497 transcriptional level, we found that ciprofloxacin reduced the abundance of TCA cycle transcripts  
498 regardless of diet, suggesting that central carbon metabolism plays a role in the activity of this  
499 antibiotic *in vivo*. Despite this commonality, we observed extensive differences in the  
500 transcriptional response of the microbiome to dietary intervention and/or ciprofloxacin treatment.  
501 Most notably, we found that diet had a major impact on the abundance of transcripts encoding  
502 known virulence and antibiotic resistance genes within the gut microbiome. Mice consuming a  
503 Western diet had a high abundance of transcripts encoding proteins known to degrade host-derived  
504 polysaccharides such as sialic residues of mucin, suggesting that the consumption of this diet may  
505 have detrimental impacts on host physiology. Lastly, we identified species-specific changes in  
506 transcript abundance in two key members of the gut microbiome, *A. muciniphila* and *B.*  
507 *thetaitaomicron*. In *A. muciniphila*, consumption of a Western diet increased the expression of  
508 several genes known to play a role in stress responses. In *B. thetaitaomicron*, we found that a  
509 number of genes involved in CPS biosynthesis were differentially expressed during ciprofloxacin  
510 treatment on the control but not Western diet, which may suggest a divergent response of this  
511 bacterium to ciprofloxacin that is dependent on nutrient composition. Taken together, these  
512 findings demonstrate the important role for host diet as a determinant of antibiotic-induced  
513 microbiome perturbations.



514 **Methods:**

515 Animal Procedures

516 All procedures involving animal work were approved by the Institutional Animal Care and  
517 Use Committee of Brown University. 4-week-old female C57BL/6 mice were purchased from  
518 Jackson Laboratories (Bar Harbor, ME, USA) and given a 2-week habituation period immediately  
519 following arrival at Brown University's Animal Care Facility. After habituation, mice were  
520 switched from standard chow (Laboratory Rodent Diet 5001, St. Louis, MO, USA) to either a  
521 Western diet (D12079B, Research Diets Inc., New Brunswick, NJ, USA) or a macronutrient-  
522 defined control diet (D122405B, Research Diets Inc., New Brunswick, NJ, USA) for 1 week.  
523 Following dietary intervention, mice were given acidified ciprofloxacin (12.5 mg/kg/day), or a  
524 pH-adjusted vehicle, via filter-sterilized drinking water *ad libitum* for 24 hours. Water  
525 consumption was monitored to assure equal consumption across cages. Mice were then sacrificed  
526 and dissected in order to collect cecal contents. Cecal contents were immediately transferred to  
527 ZymoBIOMICS DNA/RNA Miniprep Kit (Zymo Research, Irvine, CA, USA) Collection Tubes  
528 containing DNA/RNA Shield. Tubes were processed via vortexing at maximum speed for 5  
529 minutes to homogenize cecal contents, then placed on ice until permanent storage at -80°C.

530

531 Nucleic Acid Extraction & Purification

532 Total nucleic acids (DNA and RNA) were extracted from samples using the  
533 ZymoBIOMICS DNA/RNA Miniprep Kit from Zymo Research (R2002, Irvine, CA, USA) using  
534 the parallel extraction protocol as per the manufacturer instructions. Total RNA and DNA were  
535 eluted in nuclease-free water and quantified using the dsDNA-HS and RNA-HS kits on a Qubit™  
536 3.0 fluorometer (Thermo Fisher Scientific, Waltham, MA, USA) before use in library preparations.

537

## 538 Library Preparation

539 Metagenomic libraries were prepared from DNA (100 ng) using the NEBNext® Ultra II  
540 FS DNA Library Prep Kit (New England BioLabs, Ipswich, MA, USA) > 100ng input protocol as  
541 per the manufacturer's instructions. This yielded a pool of 200 – 1000 bp fragments where the  
542 average library was 250-500 bp. Metatranscriptomic libraries were prepared from total RNA using  
543 the NEBNext® Ultra II Directional RNA Sequencing Prep Kit (New England BioLabs, Ipswich,  
544 MA, USA) in conjunction with the NEBNext® rRNA Depletion Kit for Human/Mouse/Rat (New  
545 England BioLabs, Ipswich, MA, USA) and the MICROBExpress kit (Invitrogen, Carlsbad, CA,  
546 USA). First, up to 1 ug of total RNA was treated with rDNase I and subsequently depleted of  
547 bacterial rRNAs using MICROBExpress as per the manufacturer's instructions. This depleted  
548 RNA was then used to prepare libraries with the NEBNext® Ultra II Directional RNA Sequencing  
549 Prep & rRNA depletion kits as per the manufacturer's instructions. This yielded libraries that  
550 averaged between 200-450 bp. Once library preparation was complete, both metagenomic and  
551 metatranscriptomic libraries were sequenced as paired-end 150 bp reads on an Illumina HiSeq X  
552 Ten. We sequenced an average of 2,278,948,631 ( $\pm$  2,309,494,556) bases per metagenomic sample  
553 and 14,751,606,319 ( $\pm$  3,089,205,166) bases per metatranscriptomic sample. One metagenomic  
554 sample from the Western diet + vehicle group had an abnormally low number of bases sequenced  
555 (165,000 bp) and was excluded from all subsequent analyses. Following the removal of this  
556 sample, we obtained an average of 2,430,867,540 ( $\pm$  2,306,317,898) bases per metagenomic  
557 sample. All reads were deposited in the NCBI Short Read Archive under BioProject number  
558 PRJNA563913.

559

## 560 Processing of Raw Reads

561           Raw metagenomic reads were trimmed and decontaminated using kneaddata utility  
562 (version 0.6.1) [106]. In brief, reads were first trimmed to remove low quality bases and Illumina  
563 TruSeq3 adapter sequences using trimmomatic (version 0.36) using SLIDINGWINDOW value of  
564 4:20 and ILLUMINACLIP value 2:20:10, respectively [107]. Trimmed reads shorter than 75 bases  
565 were discarded. Reads passing quality control were subsequently decontaminated by removing  
566 those that mapped to the genome of C57BL/6J mice using bowtie2 (version 2.2) [108].  
567 Additionally, preliminary work by our group detected high levels of reads mapping to two murine  
568 retroviruses found in our animal facility: murine mammary tumor virus (MMTV) and murine  
569 osteosarcoma viruses (MOV) [20]. Raw metatranscriptomic reads were trimmed and  
570 decontaminated using the same parameters. However, in addition to removing reads that mapped  
571 to the C57BL/6J, MMTV, and MOV genomes, we also decontaminated sequences that aligned to  
572 the SILVA 128 LSU and SSU Parc ribosomal RNA databases [109].

573

## 574 Taxonomic Classification of Metagenomic Reads

575           Trimmed and decontaminated metagenomic reads were taxonomically classified against a  
576 database containing all bacterial and archaeal genomes found in NCBI RefSeq using Kraken2  
577 (version 2.0.7-beta) with a default k-mer length of 35 [110]. Phylum- and species-level abundances  
578 were subsequently calculated from Kraken2 reports using Bracken (version 2.0.0) with default  
579 settings [111]. The phyloseq package (version 1.28.0) in R (version 3.6.0) was used to calculate  
580 alpha diversity using the Shannon diversity index [112]. Metagenomic data was not subsampled  
581 prior to analysis.

582 To perform differential abundance testing, species-level taxonomic output was first filtered  
583 to remove taxa that were not observed in >1,000 reads (corresponding to approximately 0.1% of  
584 all reads) in at least 20% of all samples using phyloseq in R. Differential abundance testing was  
585 subsequently performed on filtered counts using the DESeq2 package (version 1.24.0) using  
586 default parameters [58]. All p-values were corrected for multiple hypothesis testing using the  
587 Benjamini-Hochberg method [113].

588

#### 589 Annotation of Metatranscriptomic Reads Using SAMSA2

590 Trimmed and decontaminated metatranscriptomic reads were annotated using a modified  
591 version of the Simple Annotation of Metatranscriptomes by Sequence Analysis 2 (SAMSA2)  
592 pipeline as described previously [20,65,114]. First, the Paired-End Read Merger (PEAR) utility  
593 was used to merge forward and reverse reads [115]. Merged reads were then aligned to databases  
594 containing entries from the RefSeq, SEED Subsystems, and Virulence Factor (downloaded  
595 04/2019) databases using DIAMOND (version 0.9.12) [116-118]. The resulting alignment counts  
596 were subsequently analyzed using DESeq2 (version 1.24.0) using the Benjamini-Hochberg  
597 method to perform multiple hypothesis testing correction [20,65,113]. Features with an adjusted  
598 p-value of less than 0.1 were considered to be statistically significant.

599

#### 600 Analysis of Antibiotic Resistance Gene (ARG) Transcript Abundance

601 The abundance of transcripts encoding known ARGs was performed using the deepARG  
602 pipeline [119]. In short, the fastq-join utility of the ea-utils package (version 1.04.807) was used  
603 to join cleaned metatranscriptomic reads [120]. Merged reads were then analyzed for the presence  
604 of ARGs using the deepARG-ss algorithm within the deepARG program (version 2.0) using

605 default settings [119]. Count tables at both the individual ARG and ARG class level were then  
606 analyzed using DESeq2 (version 1.24.0) using the Benjamini-Hochberg method to correct for  
607 multiple hypothesis testing [58,113]. ARGs with an adjusted p-value of less than 0.01 were  
608 considered to be statistically significant.

609

#### 610 Metatranscriptomic Analysis using HUMAnN2

611 To determine the impact of dietary modulation and ciprofloxacin treatment on gene  
612 expression within the gut microbiome, we used the HMP Unified Metabolic Analysis Network 2  
613 (HUMAnN2, version 0.11.1) pipeline [59]. First, metagenomic reads were taxonomically  
614 annotated using MetaPhlan2 (version 2.6.0) and functionally annotated against the UniRef90  
615 database to generate gene family and MetaCyc pathway level abundances. To ensure consistent  
616 assignment between paired samples, the taxonomic profile generated from the metagenomic reads  
617 was supplied to the HUMAnN2 algorithm during the analysis of the corresponding  
618 metatranscriptomic reads. Metatranscriptomic reads were subsequently annotated as done for  
619 metagenomic reads. The resulting gene family and pathway level abundance data from the  
620 metatranscriptomic reads was normalized against the metagenomic data from the corresponding  
621 sample and smoothed using the Witten-Bell method [121]. Lastly, the resulting RPKM values were  
622 unstratified to obtain whole-community level data, converted into relative abundances, and  
623 analyzed using LEfSe (version 1) hosted on the Galaxy web server [122].

624

#### 625 Transcriptional Analysis of *A. muciniphila* and *B. thetaiotaomicron*

626 A modified version of a previously published pipeline from Deng *et al.* was utilized to  
627 perform transcriptional analysis of individual species within the murine microbiome during dietary

628 modulation and antibiotic treatment [20,80]. First, Kraken2 (version 2.0.7-beta) was used to  
629 identify the fifty most prevalent bacterial species present within the metatranscriptomic samples  
630 [110]. Next, the BBSplit utility within the BBSplit package (version 37.96) was used to extract  
631 reads within our metatranscriptomic dataset that mapped to these fifty most abundant species  
632 [123]. Reads from *B. thetaiotaomicron* and *A. muciniphila* were subsequently aligned to their  
633 corresponding reference genomes using the BWA-MEM algorithm (version 0.7.15) [124]. Lastly,  
634 the featureCounts command within the subread program (version 1.6.2) was used to analyze the  
635 resulting alignment files to generate a count table for differential expression analysis with DESeq2  
636 [58]. All p-values were corrected for multiple hypothesis testing with the Benjamini-Hochberg  
637 method [113]. Features with an adjusted p-value of less than 0.1 were considered to be statistically  
638 significant.

639 **List of Abbreviations:**

640 PTS – phosphotransferase systems

641 MACs – microbiota-accessible carbohydrates

642 SCFAs – short chain fatty acids

643 ARGs – antibiotic resistance genes

644 TCA – tricarboxylic acid

645 HUMAnN2 – Human Microbiome Project (HMP) Unified Metabolic Analysis Network 2

646 CPS - capsular polysaccharide

647 GH98 – glycoside hydrolase family 98

648 SAMSA2 - Simple Annotation of Metatranscriptomes by Sequence Analysis 2

649 SRA – Sequence Read Archive

650 **Declarations:**

651 Ethics approval and consent to participate

652 All animal work was approved by Brown University's Institutional Animal Care and Use  
653 Committee (IACUC) under protocol number 1706000283.

654

655 Consent for publication

656 Not applicable

657

658 Availability of data and materials

659 The datasets generated and analyzed during this study are available from the NCBI Short Read  
660 Archive (SRA) under BioProject accession number PRJNA563913  
661 (<https://www.ncbi.nlm.nih.gov/bioproject/PRJNA563913>). Any additional information is  
662 available from the corresponding author upon request.

663

664 Competing interests

665 The authors declare that they have no competing interests

666

667 Funding

668 D.J.C, B.J.K, and J.I.W., and S.P. were supported by the Graduate Research Fellowship Program  
669 from the National Science Foundation under award number 1644760. P.B. was supported by the  
670 National Center for Complementary & Integrative Health of the NIH Award Number  
671 R21AT010366, and institutional development awards P20GM121344 and P20GM109035  
672 received from the National Institute of General Medical Sciences within the NIH. The funding



673 agencies had no role in the design of the study or the collection, analysis, and interpretation of  
674 data.

675

676 Authors' contributions

677 DJC planned the study, performed mouse experiments, extracted nucleic acids from cecal samples,  
678 conducted analysis of metagenomic and metatranscriptomic data, and was the primary author of  
679 the manuscript. JIW assisted with mouse experiments, prepared DNA and RNA into sequencing  
680 libraries for metagenomics and metatranscriptomics, assisted in the interpretation of results, and  
681 contributed to the writing of the manuscript. BJK performed the analysis of virulence factor and  
682 antibiotic resistance gene expression. SP assisted in the interpretation of results. PB conceptualized  
683 and planned the study, contributed to the writing of the manuscript, and secured funding. All  
684 authors have read and approved of the final manuscript.

685

686 Acknowledgements

687 Not applicable

688

689 **References:**

- 690 1. Rowan-Nash AD, Korry BJ, Mylonakis E, Belenky P. Cross-Domain and Viral Interactions in the Microbiome.  
691 *Microbiol. Mol. Biol. Rev. American Society for Microbiology*; 2019;83:51.
- 692 2. Gilbert JA, Blaser MJ, Caporaso JG, Jansson JK, Lynch SV, Knight R. Current understanding of the human  
693 microbiome. *Nat. Med. Nature Publishing Group*; 2018;24:392–400.
- 694 3. Ursell LK, Metcalf JL, Parfrey LW, Knight R. Defining the human microbiome. *Nutr. Rev.* 2012;70 Suppl 1:S38–  
695 44.
- 696 4. Stiemsma LT, Michels KB. The Role of the Microbiome in the Developmental Origins of Health and Disease.  
697 *Pediatrics. American Academy of Pediatrics*; 2018;141:e20172437.
- 698 5. Blaser M. Antibiotic overuse: Stop the killing of beneficial bacteria. *Nature [Internet]*. 2011;476:393–4. Available  
699 from: <http://www.nature.com/doi/10.1038/476393a>
- 700 6. Mukherjee PK, Chandra J, Retuerto M, Sikaroodi M, Brown RE, Jurevic R, et al. Oral mycobiome analysis of  
701 HIV-infected patients: identification of *Pichia* as an antagonist of opportunistic fungi. Hogan DA, editor. *PLoS*  
702 *Pathog. Public Library of Science*; 2014;10:e1003996.
- 703 7. Peleg AY, Hogan DA, Mylonakis E. Medically important bacterial-fungal interactions. *Nat. Rev. Microbiol.*  
704 2010;8:340–9.
- 705 8. De Luca F, Shoenfeld Y. The microbiome in autoimmune diseases. *Clin. Exp. Immunol. Wiley/Blackwell*  
706 (10.1111); 2018;195:74–85.
- 707 9. Dickerson F, Severance E, Yolken R. The microbiome, immunity, and schizophrenia and bipolar disorder. *Brain*  
708 *Behav. Immun.* 2017;62:46–52.
- 709 10. Foster JA, McVey Neufeld K-A. Gut-brain axis: how the microbiome influences anxiety and depression. *Trends*  
710 *Neurosci.* 2013;36:305–12.
- 711 11. Foster JA, Rinaman L, Cryan JF. Stress & the gut-brain axis: Regulation by the microbiome. *Neurobiology of*  
712 *Stress.* 2017;7:124–36.
- 713 12. Hartstra AV, Bouter KEC, Bäckhed F, Nieuwdorp M. Insights into the role of the microbiome in obesity and  
714 type 2 diabetes. *Diabetes Care. American Diabetes Association*; 2015;38:159–65.
- 715 13. Leong KSW, Derraik JGB, Hofman PL, Cutfield WS. Antibiotics, gut microbiome and obesity. *Clin.*  
716 *Endocrinol. (Oxf). Wiley/Blackwell* (10.1111); 2018;88:185–200.
- 717 14. Lynch SV, Boushey HA. The microbiome and development of allergic disease. *Curr Opin Allergy Clin*  
718 *Immunol.* 2016;16:165–71.
- 719 15. Riiser A. The human microbiome, asthma, and allergy. *Allergy Asthma Clin Immunol. BioMed Central*;  
720 2015;11:35.
- 721 16. Rogers MB, Firek B, Shi M, Yeh A, Brower-Sinning R, Aveson V, et al. Disruption of the microbiota across  
722 multiple body sites in critically ill children. *Microbiome. BioMed Central*; 2016;4:66.
- 723 17. Tremlett H, Bauer KC, Appel-Cresswell S, Finlay BB, Waubant E. The gut microbiome in human neurological  
724 disease: A review. *Ann. Neurol. Wiley-Blackwell*; 2017;81:369–82.
- 725 18. Vieira SM, Pagovich OE, Kriegel MA. Diet, microbiota and autoimmune diseases. *Lupus. SAGE*  
726 *PublicationsSage UK: London, England*; 2014;23:518–26.
- 727 19. Dethlefsen L, Relman DA. Incomplete recovery and individualized responses of the human distal gut microbiota  
728 to repeated antibiotic perturbation. *Proc. Natl. Acad. Sci. U.S.A. National Acad Sciences*; 2011;108 Suppl 1:4554–  
729 61.
- 730 20. Cabral DJ, Penumutthu S, Reinhart EM, Zhang C, Korry BJ, Wurster JJ, et al. Microbial Metabolism Modulates  
731 Antibiotic Susceptibility within the Murine Gut Microbiome. *Cell Metab.* 2019.
- 732 21. Chang JY, Antonopoulos DA, Kalra A, Tonelli A, Khalife WT, Schmidt TM, et al. Decreased diversity of the  
733 fecal Microbiome in recurrent *Clostridium difficile*-associated diarrhea. *J. Infect. Dis. Oxford University Press*;  
734 2008;197:435–8.
- 735 22. Preidis GA, Versalovic J. Targeting the human microbiome with antibiotics, probiotics, and prebiotics:  
736 gastroenterology enters the metagenomics era. *Gastroenterology. NIH Public Access*; 2009;136:2015–31.
- 737 23. Theriot CM, Bowman AA, Young VB. Antibiotic-Induced Alterations of the Gut Microbiota Alter Secondary  
738 Bile Acid Production and Allow for *Clostridium difficile* Spore Germination and Outgrowth in the Large Intestine.  
739 Ellermeier CD, editor. *mSphere. American Society for Microbiology Journals*; 2016;1:e00045–15.

- 740 24. Rea MC, Dobson A, O'Sullivan O, Crispie F, Fouhy F, Cotter PD, et al. Effect of broad- and narrow-spectrum  
741 antimicrobials on *Clostridium difficile* and microbial diversity in a model of the distal colon. *Proc. Natl. Acad. Sci.*  
742 U.S.A. National Academy of Sciences; 2011;108 Suppl 1:4639–44.
- 743 25. Raffi F, Sutherland JB, Cerniglia CE. Effects of treatment with antimicrobial agents on the human colonic  
744 microflora. *Ther Clin Risk Manag*. Dove Press; 2008;4:1343–58.
- 745 26. Lessa FC, Winston LG, McDonald LC, Emerging Infections Program C. *difficile* Surveillance Team. Burden of  
746 *Clostridium difficile* infection in the United States. *N. Engl. J. Med.* 2015;372:2369–70.
- 747 27. Hryckowian AJ, Van Treuren W, Smits SA, Davis NM, Gardner JO, Bouley DM, et al. Microbiota-accessible  
748 carbohydrates suppress *Clostridium difficile* infection in a murine model. *Nature Microbiology*. Nature Publishing  
749 Group; 2018;3:662–9.
- 750 28. Durack J, Huang YJ, Nariya S, Christian LS, Mark Ansel K, Beigelman A, et al. Bacterial biogeography of adult  
751 airways in atopic asthma. *Microbiome*. BioMed Central; 2018;6:104.
- 752 29. Wu GD, Chen J, Hoffmann C, Bittinger K, Chen Y-Y, Keilbaugh SA, et al. Linking long-term dietary patterns  
753 with gut microbial enterotypes. *Science*. American Association for the Advancement of Science; 2011;334:105–8.
- 754 30. Smits SA, Leach J, Sonnenburg ED, Gonzalez CG, Lichtman JS, Reid G, et al. Seasonal cycling in the gut  
755 microbiome of the Hadza hunter-gatherers of Tanzania. *Science*. American Association for the Advancement of  
756 Science; 2017;357:802–6.
- 757 31. Smits SA, Marcobal A, Higginbottom S, Sonnenburg JL, Kashyap PC. Individualized Responses of Gut  
758 Microbiota to Dietary Intervention Modeled in Humanized Mice. Dorrestein PC, editor. *mSystems*. American  
759 Society for Microbiology Journals; 2016;1:105.
- 760 32. Bisanz JE, Upadhyay V, Turnbaugh JA, Ly K, Turnbaugh PJ. Meta-Analysis Reveals Reproducible Gut  
761 Microbiome Alterations in Response to a High-Fat Diet. *Cell Host Microbe*. 2019.
- 762 33. Ley RE, Bäckhed F, Turnbaugh P, Lozupone CA, Knight RD, Gordon JI. Obesity alters gut microbial ecology.  
763 *Proc. Natl. Acad. Sci. U.S.A. National Academy of Sciences*; 2005;102:11070–5.
- 764 34. Turnbaugh PJ, Ridaura VK, Faith JJ, Rey FE, Knight R, Gordon JI. The effect of diet on the human gut  
765 microbiome: a metagenomic analysis in humanized gnotobiotic mice. *Science Translational Medicine*. American  
766 Association for the Advancement of Science; 2009;1:6ra14–4.
- 767 35. Xu Z, Knight R. Dietary effects on human gut microbiome diversity. *Br. J. Nutr.* 2015;113 Suppl:S1–5.
- 768 36. Argueta DA, DiPatrizio NV. Peripheral endocannabinoid signaling controls hyperphagia in western diet-induced  
769 obesity. *Physiology & Behavior*. 2017;171:32–9.
- 770 37. Kanoski SE, Hsu TM, Pennell S. Obesity, Western Diet Intake, and Cognitive Impairment. *Omega-3 Fatty Acids*  
771 *in Brain and Neurological Health*. Elsevier; 2014. pp. 57–62.
- 772 38. Sami W, Ansari T, Butt NS, Hamid MRA. Effect of diet on type 2 diabetes mellitus: A review. *Int J Health Sci*  
773 (Qassim). Qassim University; 2017;11:65–71.
- 774 39. Qi L, Cornelis MC, Zhang C, van Dam RM, Hu FB. Genetic predisposition, Western dietary pattern, and the risk  
775 of type 2 diabetes in men. *Am. J. Clin. Nutr.* 2009;89:1453–8.
- 776 40. Sonnenburg ED, Sonnenburg JL. Starving our microbial self: the deleterious consequences of a diet deficient in  
777 microbiota-accessible carbohydrates. *Cell Metab*. 2014;20:779–86.
- 778 41. Sonnenburg ED, Sonnenburg JL. The ancestral and industrialized gut microbiota and implications for human  
779 health. *Nat. Rev. Microbiol*. Nature Publishing Group; 2019;17:383–90.
- 780 42. Sonnenburg JL, Xu J, Leip DD, Chen CH, Westover BP, Weatherford J, et al. Glycan foraging in vivo by an  
781 intestine-adapted bacterial symbiont. *Science*. American Association for the Advancement of Science;  
782 2005;307:1955–9.
- 783 43. Turnbaugh PJ. Microbes and Diet-Induced Obesity: Fast, Cheap, and Out of Control. *Cell Host Microbe*.  
784 2017;21:278–81.
- 785 44. Trompette A, Gollwitzer ES, Yadava K, Sichelstiel AK, Sprenger N, Ngom-Bru C, et al. Gut microbiota  
786 metabolism of dietary fiber influences allergic airway disease and hematopoiesis. *Nat. Med*. Nature Publishing  
787 Group; 2014;20:159–66.
- 788 45. Arpaia N, Campbell C, Fan X, Dikiy S, van der Veeken J, deRoos P, et al. Metabolites produced by commensal  
789 bacteria promote peripheral regulatory T-cell generation. *Nature*. Nature Publishing Group; 2013;504:451–.

- 790 46. Cotillard A, Kennedy SP, Kong LC, Prifti E, Pons N, Le Chatelier E, et al. Dietary intervention impact on gut  
791 microbial gene richness. *Nature*. Nature Publishing Group; 2013;500:585–.
- 792 47. Walker AW, Ince J, Duncan SH, Webster LM, Holtrop G, Ze X, et al. Dominant and diet-responsive groups of  
793 bacteria within the human colonic microbiota. *ISME J*. Nature Publishing Group; 2011;5:220–30.
- 794 48. Fischbach MA, Sonnenburg JL. Eating for two: how metabolism establishes interspecies interactions in the gut.  
795 *Cell Host Microbe*. 2011;10:336–47.
- 796 49. Kashyap PC, Marcobal A, Ursell LK, Smits SA, Sonnenburg ED, Costello EK, et al. Genetically dictated change  
797 in host mucus carbohydrate landscape exerts a diet-dependent effect on the gut microbiota. *Proc. Natl. Acad. Sci.*  
798 *U.S.A.* National Academy of Sciences; 2013;110:17059–64.
- 799 50. Yatsunenkov T, Rey FE, Manary MJ, Trehan I, Dominguez-Bello MG, Contreras M, et al. Human gut  
800 microbiome viewed across age and geography. *Nature*. Nature Publishing Group; 2012;486:222–.
- 801 51. Wong J, de Souza R, Kendall C, Emam A, Jenkins D. Colonic health: Fermentation and short chain fatty acids.  
802 *Journal of Clinical Gastroenterology*. 2006;40:235–43.
- 803 52. Topping DL, Clifton PM. Short-chain fatty acids and human colonic function: Roles of resistant starch and  
804 nonstarch polysaccharides. *Physiol. Rev*. 2001;81:1031–64.
- 805 53. Macfarlane S, Macfarlane GT. Regulation of short-chain fatty acid production. *Proceedings of the Nutrition*  
806 *Society*. Cambridge University Press; 2003;62:67–72.
- 807 54. Cani PD, Van Hul M, Lefort C, Depommier C, Rastelli M, Everard A. Microbial regulation of organismal  
808 energy homeostasis. *Nat Metab*. Nature Publishing Group; 2019;1:34–46.
- 809 55. Chambers ES, Preston T, Frost G, Morrison DJ. Role of Gut Microbiota-Generated Short-Chain Fatty Acids in  
810 Metabolic and Cardiovascular Health. *Curr Nutr Rep*. Springer US; 2018;7:198–206.
- 811 56. David LA, Maurice CF, Carmody RN, Gootenberg DB, Button JE, Wolfe BE, et al. Diet rapidly and  
812 reproducibly alters the human gut microbiome. *Nature*. 2014;505:559–.
- 813 57. Shin N-R, Whon TW, Bae J-W. Proteobacteria: microbial signature of dysbiosis in gut microbiota. *Trends*  
814 *Biotechnol*. 2015;33:496–503.
- 815 58. Love MI, Huber W, Anders S. Moderated estimation of fold change and dispersion for RNA-seq data with  
816 DESeq2. *Genome Biol*. BioMed Central; 2014;15:550.
- 817 59. Franzosa EA, McIver LJ, Rahnavard G, Thompson LR, Schirmer M, Weingart G, et al. Species-level functional  
818 profiling of metagenomes and metatranscriptomes. *Nat. Methods*. Nature Publishing Group; 2018;15:962–8.
- 819 60. Meylan S, Porter CBM, Yang JH, Belenky P, Gutierrez A, Lobritz MA, et al. Carbon Sources Tune Antibiotic  
820 Susceptibility in *Pseudomonas aeruginosa* via Tricarboxylic Acid Cycle Control. *Cell Chem Biol*. 2017;24:195–206.
- 821 61. Belenky P, Ye JD, Porter CBM, Cohen NR, Lobritz MA, Ferrante T, et al. Bactericidal Antibiotics Induce Toxic  
822 Metabolic Perturbations that Lead to Cellular Damage. *Cell Rep*. 2015;13:968–80.
- 823 62. Lobritz MA, Belenky P, Porter CBM, Gutierrez A, Yang JH, Schwarz EG, et al. Antibiotic efficacy is linked to  
824 bacterial cellular respiration. *Proc. Natl. Acad. Sci. U.S.A.* National Acad Sciences; 2015;112:8173–80.
- 825 63. Dwyer DJ, Belenky PA, Yang JH, MacDonald IC, Martell JD, Takahashi N, et al. Antibiotics induce redox-  
826 related physiological alterations as part of their lethality. *Proc. Natl. Acad. Sci. U.S.A.* 2014;111:E2100–9.
- 827 64. Dwyer DJ, Kohanski MA, Hayete B, Collins JJ. Gyrase inhibitors induce an oxidative damage cellular death  
828 pathway in *Escherichia coli*. *Mol. Syst. Biol*. EMBO Press; 2007;3:91.
- 829 65. Westreich ST, Treiber ML, Mills DA, Korf I, Lemay DG. SAMSA2: a standalone metatranscriptome analysis  
830 pipeline. *BMC Bioinformatics*. BioMed Central; 2018;19:175.
- 831 66. Corfield AP, Wagner SA, Clamp JR, Kriaris MS, Hoskins LC. Mucin degradation in the human colon:  
832 production of sialidase, sialate O-acetyltransferase, N-acetylneuraminidase, arylesterase, and glycosulfatase  
833 activities by strains of fecal bacteria. *Infect. Immun*. American Society for Microbiology (ASM); 1992;60:3971–8.
- 834 67. Anderson KM, Ashida H, Maskos K, Dell A, Li S-C, Li Y-T. A clostridial endo-beta-galactosidase that cleaves  
835 both blood group A and B glycotopes: the first member of a new glycoside hydrolase family, GH98. *J. Biol. Chem*.  
836 2005;280:7720–8.
- 837 68. Ramos HC, Rumbo M, Sirard J-C. Bacterial flagellins: mediators of pathogenicity and host immune responses in  
838 mucosa. *Trends Microbiol*. 2004;12:509–17.
- 839 69. Haiko J, Westerlund-Wikström B. The role of the bacterial flagellum in adhesion and virulence. *Biology (Basel)*.  
840 *Multidisciplinary Digital Publishing Institute*; 2013;2:1242–67.

- 841 70. Curtis MM, Hu Z, Klimko C, Narayanan S, Deberardinis R, Sperandio V. The gut commensal *Bacteroides*  
842 *thetaiotaomicron* exacerbates enteric infection through modification of the metabolic landscape. *Cell Host Microbe*.  
843 2014;16:759–69.
- 844 71. Sanchez KK, Chen GY, Schieber AMP, Redford SE, Shokhirev MN, Leblanc M, et al. Cooperative Metabolic  
845 Adaptations in the Host Can Favor Asymptomatic Infection and Select for Attenuated Virulence in an Enteric  
846 Pathogen. *Cell*. 2018;175:146–158.e15.
- 847 72. Pacheco AR, Curtis MM, Ritchie JM, Munera D, Waldor MK, Moreira CG, et al. Fucose sensing regulates  
848 bacterial intestinal colonization. *Nature*. Nature Publishing Group; 2012;492:113–7.
- 849 73. Njoroge JW, Nguyen Y, Curtis MM, Moreira CG, Sperandio V. Virulence meets metabolism: Cra and KdpE  
850 gene regulation in enterohemorrhagic *Escherichia coli*. Sansonetti PJ, editor. *mBio*. 2nd ed. American Society for  
851 Microbiology; 2012;3:e00280–12.
- 852 74. Baron SA, Diene SM, Rolain J-M. Human microbiomes and antibiotic resistance. *Human Microbiome Journal*.  
853 2018;10:43–52.
- 854 75. Fang H, Edlund C, Nord CE, Hedberg M. Selection of cefoxitin-resistant *Bacteroides thetaiotaomicron* mutants  
855 and mechanisms involved in beta-lactam resistance. *Clin. Infect. Dis*. 2002;35:S47–53.
- 856 76. Nguyen MH, Yu VL, Morris AJ, McDermott L, Wagener MW, Harrell L, et al. Antimicrobial resistance and  
857 clinical outcome of *Bacteroides bacteremia*: findings of a multicenter prospective observational trial. *Clin. Infect.*  
858 *Dis*. 2000;30:870–6.
- 859 77. Sadarangani SP, Cunningham SA, Jeraldo PR, Wilson JW, Khare R, Patel R. Metronidazole- and carbapenem-  
860 resistant *Bacteroides thetaiotaomicron* isolated in Rochester, Minnesota, in 2014. *Antimicrob. Agents Chemother*.  
861 American Society for Microbiology Journals; 2015;59:4157–61.
- 862 78. Ulger Toprak N, Celik C, Cakici O, Soyler G. Antimicrobial susceptibilities of *Bacteroides fragilis* and  
863 *Bacteroides thetaiotaomicron* strains isolated from clinical specimens and human intestinal microbiota. *Anaerobe*.  
864 2004;10:255–9.
- 865 79. Stiefel U, Tima MA, Nerandzic MM. Metallo- $\beta$ -Lactamase-Producing *Bacteroides* Species Can Shield Other  
866 Members of the Gut Microbiota from Antibiotics. *Antimicrob. Agents Chemother*. American Society for  
867 Microbiology Journals; 2015;59:650–3.
- 868 80. Deng Z-L, Sztajer H, Jarek M, Bhujji S, Wagner-Döbler I. Worlds Apart - Transcriptome Profiles of Key Oral  
869 Microbes in the Periodontal Pocket Compared to Single Laboratory Culture Reflect Synergistic Interactions. *Front*  
870 *Microbiol*. *Frontiers*; 2018;9:124.
- 871 81. Bubić A, Mrnjavac N, Stuparević I, Łyczek M, Wielgus-Kutrowska B, Bzowska A, et al. In the quest for new  
872 targets for pathogen eradication: the adenylosuccinate synthetase from the bacterium *Helicobacter pylori*. *J Enzyme*  
873 *Inhib Med Chem*. Taylor & Francis; 2018;33:1405–14.
- 874 82. Susin MF, Baldini RL, Gueiros-Filho F, Gomes SL. GroES/GroEL and DnaK/DnaJ have distinct roles in stress  
875 responses and during cell cycle progression in *Caulobacter crescentus*. *J. Bacteriol*. American Society for  
876 Microbiology Journals; 2006;188:8044–53.
- 877 83. Anglès F, Castanié-Cornet M-P, Slama N, Dinclaux M, Cirinesi A-M, Portais J-C, et al. Multilevel interaction of  
878 the DnaK/DnaJ(HSP70/HSP40) stress-responsive chaperone machine with the central metabolism. *Sci Rep*. Nature  
879 Publishing Group; 2017;7:41341.
- 880 84. Ogata Y, Mizushima T, Kataoka K, Kita K, Miki T, Sekimizu K. DnaK heat shock protein of *Escherichia coli*  
881 maintains the negative supercoiling of DNA against thermal stress. *J. Biol. Chem*. American Society for  
882 Biochemistry and Molecular Biology; 1996;271:29407–14.
- 883 85. Wong KS, Houry WA. Novel structural and functional insights into the MoxR family of AAA+ ATPases. *J*.  
884 *Struct. Biol*. 2012;179:211–21.
- 885 86. Coyne MJ, Comstock LE. Niche-specific features of the intestinal bacteroidales. *J. Bacteriol*. American Society  
886 for Microbiology Journals; 2008;190:736–42.
- 887 87. Porter NT, Canales P, Peterson DA, Martens EC. A Subset of Polysaccharide Capsules in the Human Symbiont  
888 *Bacteroides thetaiotaomicron* Promote Increased Competitive Fitness in the Mouse Gut. *Cell Host Microbe*.  
889 2017;22:494–.
- 890 88. Petit C, Rigg GP, Pazzani C, Smith A, Sieberth V, Stevens M, et al. Region 2 of the *Escherichia coli* K5 capsule  
891 gene cluster encoding proteins for the biosynthesis of the K5 polysaccharide. *Mol. Microbiol*. John Wiley & Sons,  
892 Ltd (10.1111); 1995;17:611–20.

- 893 89. van Selm S, Kolkman MAB, van der Zeijst BAM, Zwaagstra KA, Gaastra W, van Putten JPM. Organization and  
894 characterization of the capsule biosynthesis locus of *Streptococcus pneumoniae* serotype 9V. *Microbiology*.  
895 *Microbiology Society*; 2002;148:1747–55.
- 896 90. Dougherty BA, van de Rijn I. Molecular characterization of hasB from an operon required for hyaluronic acid  
897 synthesis in group A streptococci. Demonstration of UDP-glucose dehydrogenase activity. *J. Biol. Chem.*  
898 1993;268:7118–24.
- 899 91. Cabral DJ, Wurster JI, Belenky P. Antibiotic Persistence as a Metabolic Adaptation: Stress, Metabolism, the  
900 Host, and New Directions. *Pharmaceuticals (Basel)*. Multidisciplinary Digital Publishing Institute; 2018;11:14.
- 901 92. Rowan AD, Cabral DJ, Belenky P. Bactericidal antibiotics induce programmed metabolic toxicity. *Microb Cell*.  
902 *Shared Science Publishers*; 2016;3:178–80.
- 903 93. Allison KR, Brynildsen MP, Collins JJ. Metabolite-enabled eradication of bacterial persisters by  
904 aminoglycosides. *Nature*. *Nature Publishing Group*; 2011;473:216–20.
- 905 94. Kohanski MA, Dwyer DJ, Hayete B, Lawrence CA, Collins JJ. A common mechanism of cellular death induced  
906 by bactericidal antibiotics. *Cell*. 2007;130:797–810.
- 907 95. Thomas VC, Chittezhham Thomas V, Kinkead LC, Janssen A, Schaeffer CR, Woods KM, et al. A dysfunctional  
908 tricarboxylic acid cycle enhances fitness of *Staphylococcus epidermidis* during  $\beta$ -lactam stress. *mBio*. *American*  
909 *Society for Microbiology*; 2013;4:e00437–13–e00437–13.
- 910 96. Adolfsen KJ, Brynildsen MP. Futile cycling increases sensitivity toward oxidative stress in *Escherichia coli*.  
911 *Metab. Eng.* 2015;29:26–35.
- 912 97. Cho H, Uehara T, Bernhardt TG. Beta-lactam antibiotics induce a lethal malfunctioning of the bacterial cell wall  
913 synthesis machinery. *Cell*. 2014;159:1300–11.
- 914 98. Zinöcker MK, Lindseth IA. The Western Diet-Microbiome-Host Interaction and Its Role in Metabolic Disease.  
915 *Nutrients*. Multidisciplinary Digital Publishing Institute; 2018;10:365.
- 916 99. Chassaing B, Van de Wiele T, Gewirtz A. O-013 Dietary Emulsifiers Directly Impact the Human Gut  
917 Microbiota Increasing Its Pro-inflammatory Potential and Ability to Induce Intestinal Inflammation. *Inflammatory*  
918 *Bowel Diseases*. 2017;23.
- 919 100. Collins J, Robinson C, Danhof H, Knetsch CW, van Leeuwen HC, Lawley TD, et al. Dietary trehalose  
920 enhances virulence of epidemic *Clostridium difficile*. *Nature*. *Nature Publishing Group*; 2018;553:291–4.
- 921 101. Human Microbiome Project Consortium. A framework for human microbiome research. *Nature*. *Nature*  
922 *Publishing Group*; 2012;486:215–21.
- 923 102. Singh RK, Chang H-W, Yan D, Lee KM, Ucmak D, Wong K, et al. Influence of diet on the gut microbiome  
924 and implications for human health. *J Transl Med*. 4 ed. *BioMed Central*; 2017;15:73–17.
- 925 103. Johnson AJ, Vangay P, Al-Ghalith GA, Hillmann BM, Ward TL, Shields-Cutler RR, et al. Daily Sampling  
926 Reveals Personalized Diet-Microbiome Associations in Humans. *Cell Host Microbe*. 2019;25:789–802.e5.
- 927 104. Turnbaugh PJ, Ley RE, Mahowald MA, Magrini V, Mardis ER, Gordon JI. An obesity-associated gut  
928 microbiome with increased capacity for energy harvest. *Nature*. *Nature Publishing Group*; 2006;444:1027–131.
- 929 105. Turnbaugh PJ, Bäckhed F, Fulton L, Gordon JI. Diet-induced obesity is linked to marked but reversible  
930 alterations in the mouse distal gut microbiome. *Cell Host Microbe*. 2008;3:213–23.
- 931 106. McIver LJ, Abu-Ali G, Franzosa EA, Schwager R, Morgan XC, Waldron L, et al. bioBakery: a meta'omic  
932 analysis environment. *Hancock J, editor. Bioinformatics*. 2018;34:1235–7.
- 933 107. Bolger AM, Lohse M, Usadel B. Trimmomatic: a flexible trimmer for Illumina sequence data. *Bioinformatics*.  
934 2014;30:2114–20.
- 935 108. Langmead B, Salzberg SL. Fast gapped-read alignment with Bowtie 2. *Nat. Methods*. 2012;9:357–9.
- 936 109. Pruesse E, Quast C, Knittel K, Fuchs BM, Ludwig W, Peplies J, et al. SILVA: a comprehensive online resource  
937 for quality checked and aligned ribosomal RNA sequence data compatible with ARB. *Nucleic Acids Research*.  
938 2007;35:7188–96.
- 939 110. Wood DE, Salzberg SL. Kraken: ultrafast metagenomic sequence classification using exact alignments.  
940 *Genome Biol*. *BioMed Central*; 2014;15:R46.
- 941 111. Lu J, Breitwieser FP, Thielen P, Salzberg SL. Bracken: estimating species abundance in metagenomics data.  
942 *PeerJ Computer Science*. *PeerJ Inc*; 2017;3:e104.

- 943 112. McMurdie PJ, Holmes S. phyloseq: an R package for reproducible interactive analysis and graphics of  
944 microbiome census data. Watson M, editor. PLoS ONE. Public Library of Science; 2013;8:e61217.
- 945 113. Benjamini Y, Hochberg Y. Controlling the False Discovery Rate: A Practical and Powerful Approach to  
946 Multiple Testing. Journal of the Royal Statistical Society. Series B (Methodological). Wiley; 1995;57:289–300.
- 947 114. Westreich ST, Korf I, Mills DA, Lemay DG. SAMSA: a comprehensive metatranscriptome analysis pipeline.  
948 BMC Bioinformatics. BioMed Central; 2016;17:399.
- 949 115. Zhang J, Kobert K, Flouri T, Stamatakis A. PEAR: a fast and accurate Illumina Paired-End reAd mergeR.  
950 Bioinformatics. 2014;30:614–20.
- 951 116. Chen L, Yang J, Yu J, Yao Z, Sun L, Shen Y, et al. VFDB: a reference database for bacterial virulence factors.  
952 Nucleic Acids Research. 2005;33:D325–8.
- 953 117. Overbeek R, Olson R, Pusch GD, Olsen GJ, Davis JJ, Disz T, et al. The SEED and the Rapid Annotation of  
954 microbial genomes using Subsystems Technology (RAST). Nucleic Acids Research. 2014;42:D206–14.
- 955 118. Buchfink B, Xie C, Huson DH. Fast and sensitive protein alignment using DIAMOND. Nat. Methods. Nature  
956 Publishing Group; 2015;12:59–60.
- 957 119. Arango-Argoty G, Garner E, Pruden A, Heath LS, Vikesland P, Zhang L. DeepARG: a deep learning approach  
958 for predicting antibiotic resistance genes from metagenomic data. Microbiome. BioMed Central; 2018;6:23.
- 959 120. Aronesty E. Comparison of Sequencing Utility Programs. TOBIOIJ. 2013;7:1–8.
- 960 121. Witten IH, Bell TC. The zero-frequency problem: estimating the probabilities of novel events in adaptive text  
961 compression. IEEE Trans. Inform. Theory. 1991;37:1085–94.
- 962 122. Segata N, Izard J, Waldron L, Gevers D, Miropolsky L, Garrett WS, et al. Metagenomic biomarker discovery  
963 and explanation. Genome Biol. BioMed Central; 2011;12:R60.
- 964 123. Bushnell B. BMap. 2014.
- 965 124. Li H, Durbin R. Fast and accurate long-read alignment with Burrows-Wheeler transform. Bioinformatics.  
966 2010;26:589–95.

967

**Figures:**

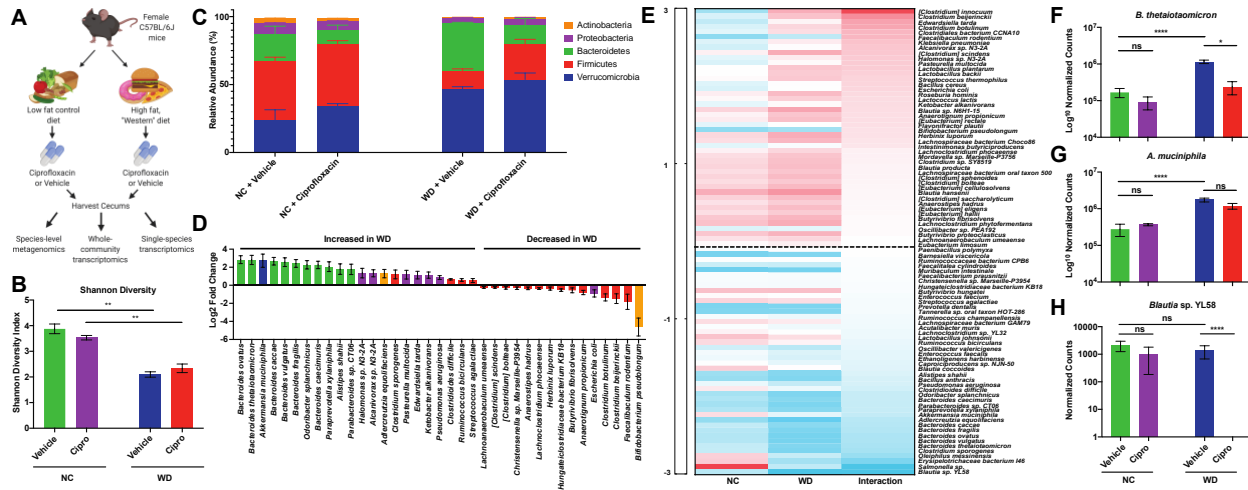

968  
969

**Figure 1:** Impact of diet and ciprofloxacin administration on murine gut microbiome composition

- A. Experimental workflow used in this study. Figure was created with Biorender.com.
- B. Alpha diversity of experimental groups as measured by the Shannon Diversity Index. Data are represented as mean  $\pm$  standard error of the mean (SEM). (\*\* $p < 0.01$ , Welch ANOVA with Dunnett T3 test for multiple hypothesis testing).
- C. Stacked barplot of the five most abundant bacterial phyla in our dataset. Data are represented as mean + SEM for each phylum.
- D. Differentially abundant (Benjamini-Hochberg adjusted  $p$ -value  $< 0.1$ ) bacterial species detected in mice consuming the Western diet (WD). Data are represented as  $\log_2$  fold change relative to control diet  $\pm$  standard error. Bar color denotes phylum level taxonomic classification (blue – *Verrucomicrobia*, red – *Firmicutes*, green – *Bacteroidetes*, purple – *Proteobacteria*, orange – *Actinobacteria*).
- E. Heatmap of the change in abundance of the top 90 bacterial species in response to ciprofloxacin on control (NC) and Western (WD) diets. The Interaction column represents the interaction term generated by DESeq2, denoting the impact of diet on the change in abundance of each species to ciprofloxacin. Cell color denotes  $\log_2$  fold change of a particular species in response to ciprofloxacin. Heatmap rows are sorted by interaction term value from highest to lowest.
- (F-H) Normalized counts of *B. thetaiotaomicron* (F), *A. muciniphila* (G), and *Blautia* sp. YL58 (H) in each experimental group. Data are represented as mean  $\pm$  SEM. Normalized counts were generated with DESeq2 and subsequently used to perform differential abundance testing. (\* $p < 0.05$ , \*\*\*\* $p < 0.0001$ , Wald test with Benjamini and Hochberg correction).

992

For all analyses,  $n \geq 3$ . For full DESeq2 results, see Additional File 1.

993



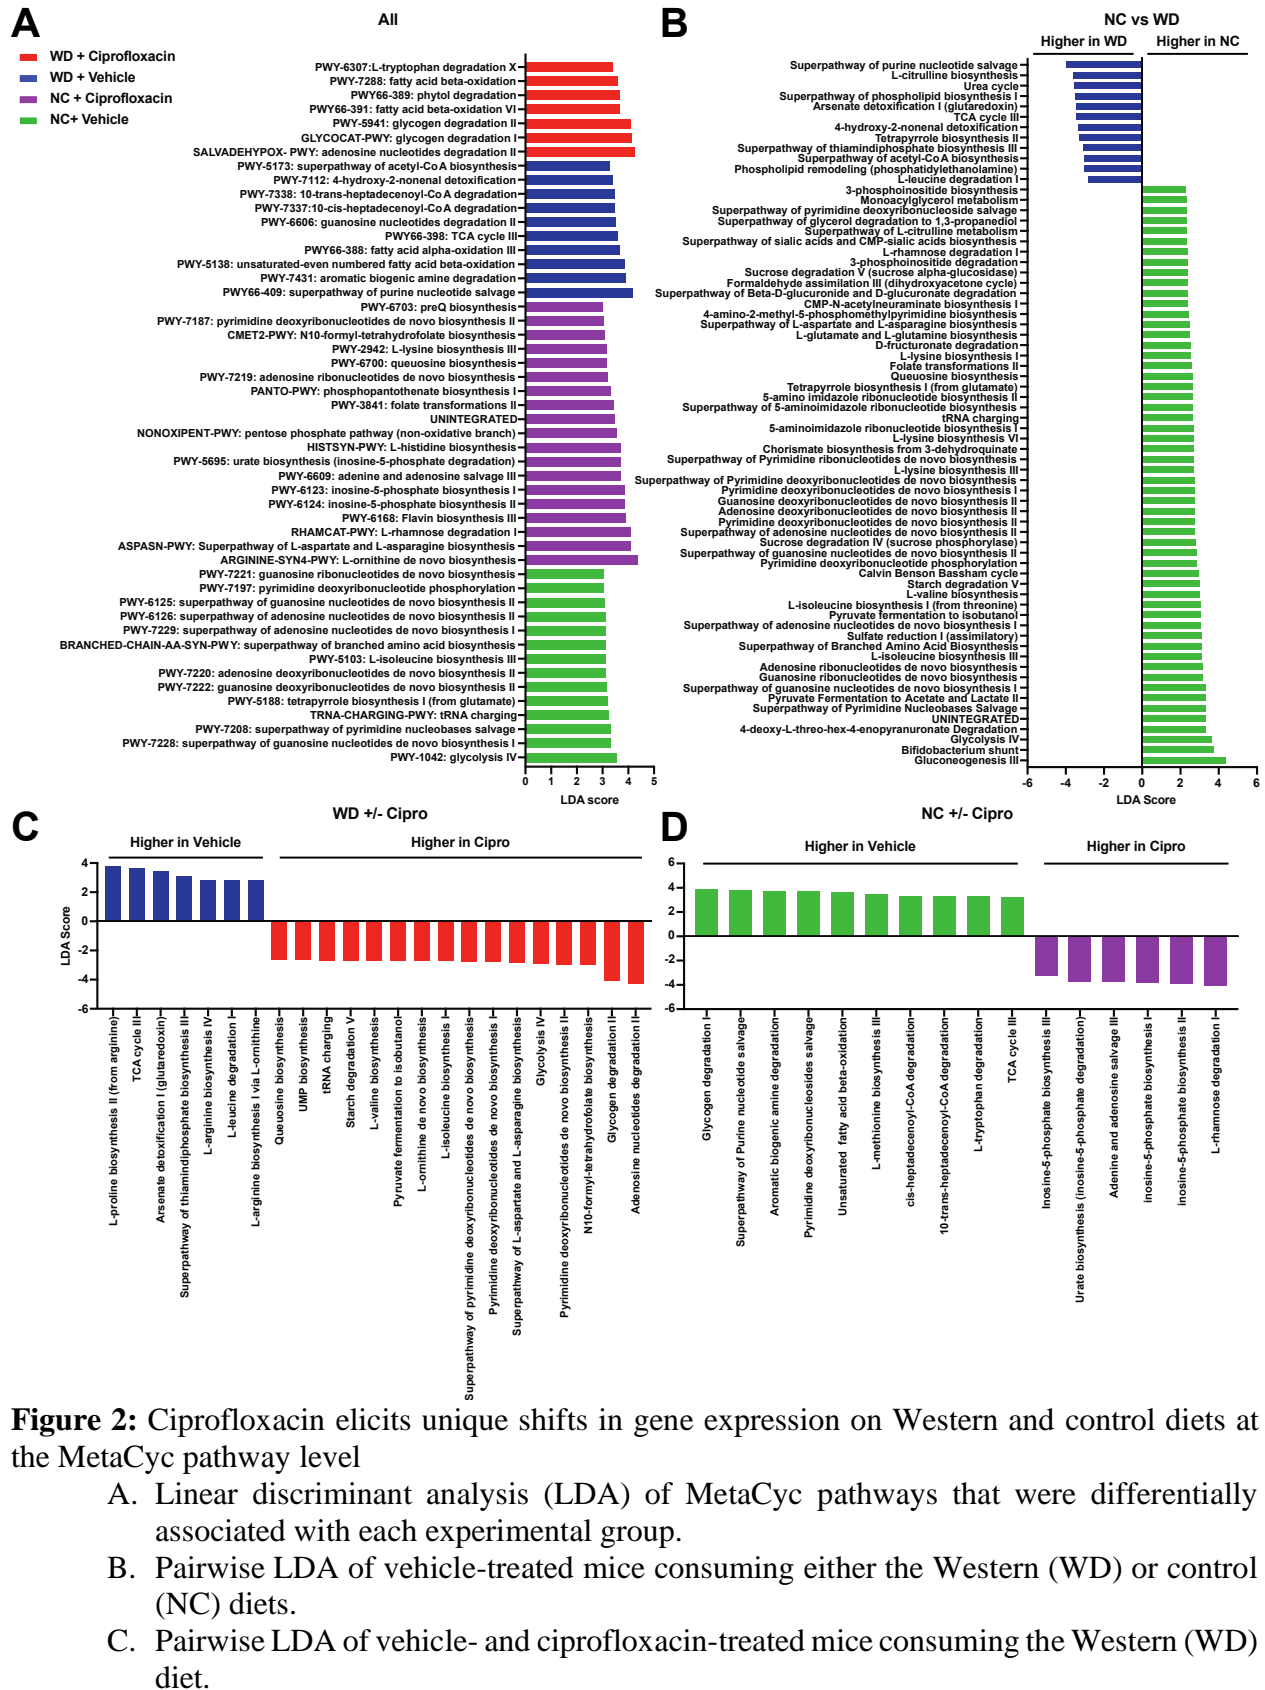

994  
995  
996  
997  
998  
999  
1000  
1001  
1002

1003           D. Pairwise LDA of vehicle- and ciprofloxacin-treated mice consuming the control (NC)  
1004           diet.  
1005   Bar size indicates LDA score and color indicates the experimental group that a MetaCyc pathway  
1006   was significantly associated with. All LDA scores were generated using LEfSe on unstratified  
1007   pathway outputs from HUMAnN2. For all analyses,  $n \geq 3$ . For full pathway names and statistics,  
1008   see Additional File 2.

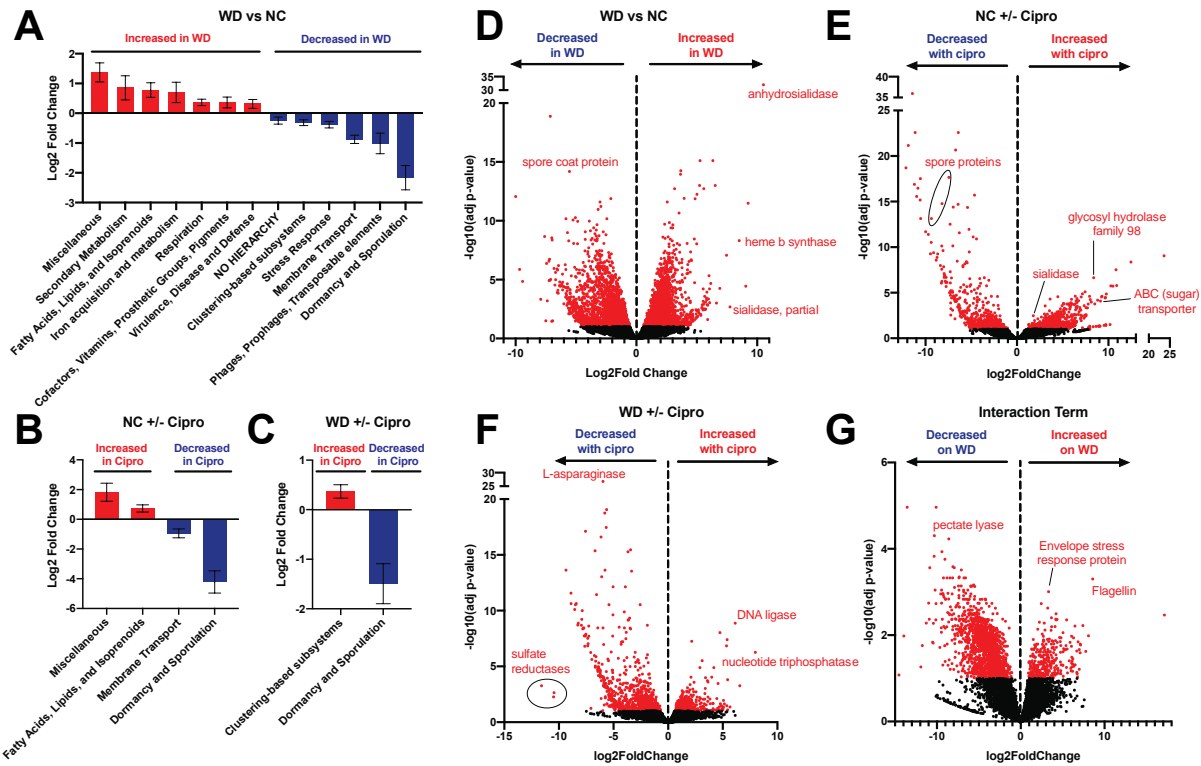

1009

1010

1011

**Figure 3:** Ciprofloxacin has a differential impact on the abundance of iron metabolism and mucin degradation transcripts on the Western versus control diet

1012

1013

1014

1015

1016

1017

1018

1019

1020

1021

1022

1023

1024

1025

1026

1027

1028

1029

1030

1031

1032

1033

1034

1035

(D-G) Volcano plots of the metatranscriptomic profile of the murine cecal microbiome in vehicle-treated mice consuming Western diet (D), ciprofloxacin-treated mice on the control diet (E), and ciprofloxacin-treated mice on the Western diet (F). Interaction terms representing the impact of diet on ciprofloxacin-induced changes for each transcript are shown in (G). Data was generated by aligning metatranscriptomic reads to RefSeq using SAMSA2 and analyzing using DESeq2. Points in red represent transcripts for which a statistically significant change in expression was detected (Benjamini-Hochberg adjusted p-value < 0.1). Select genes of interest are labeled. See Additional File 4 for full results.

For all analyses, n = 4.

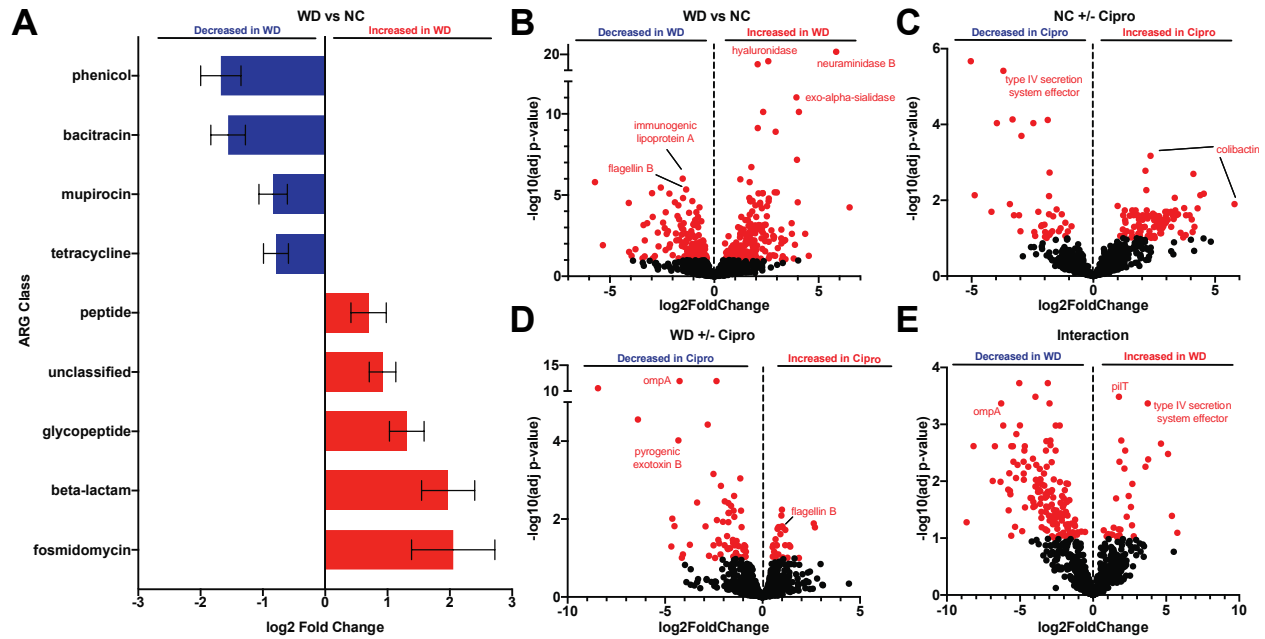

1036

1037

1038

**Figure 4:** Host diet has a major impact on the transcript abundance of antibiotic-resistance and virulence factor genes

1039

1040

1041

1042

A. Differentially expressed (Benjamini-Hochberg adjusted p-value < 0.1) ARG classes in the murine cecal metatranscriptome in vehicle-treated mice consuming the Western (WD) diet. Data are represented as log<sub>2</sub> fold change relative to control diet ± standard error. See Additional File 5

1043

1044

1045

1046

1047

1048

1049

1050

Additional File 6

1051

For all analyses, n = 4.

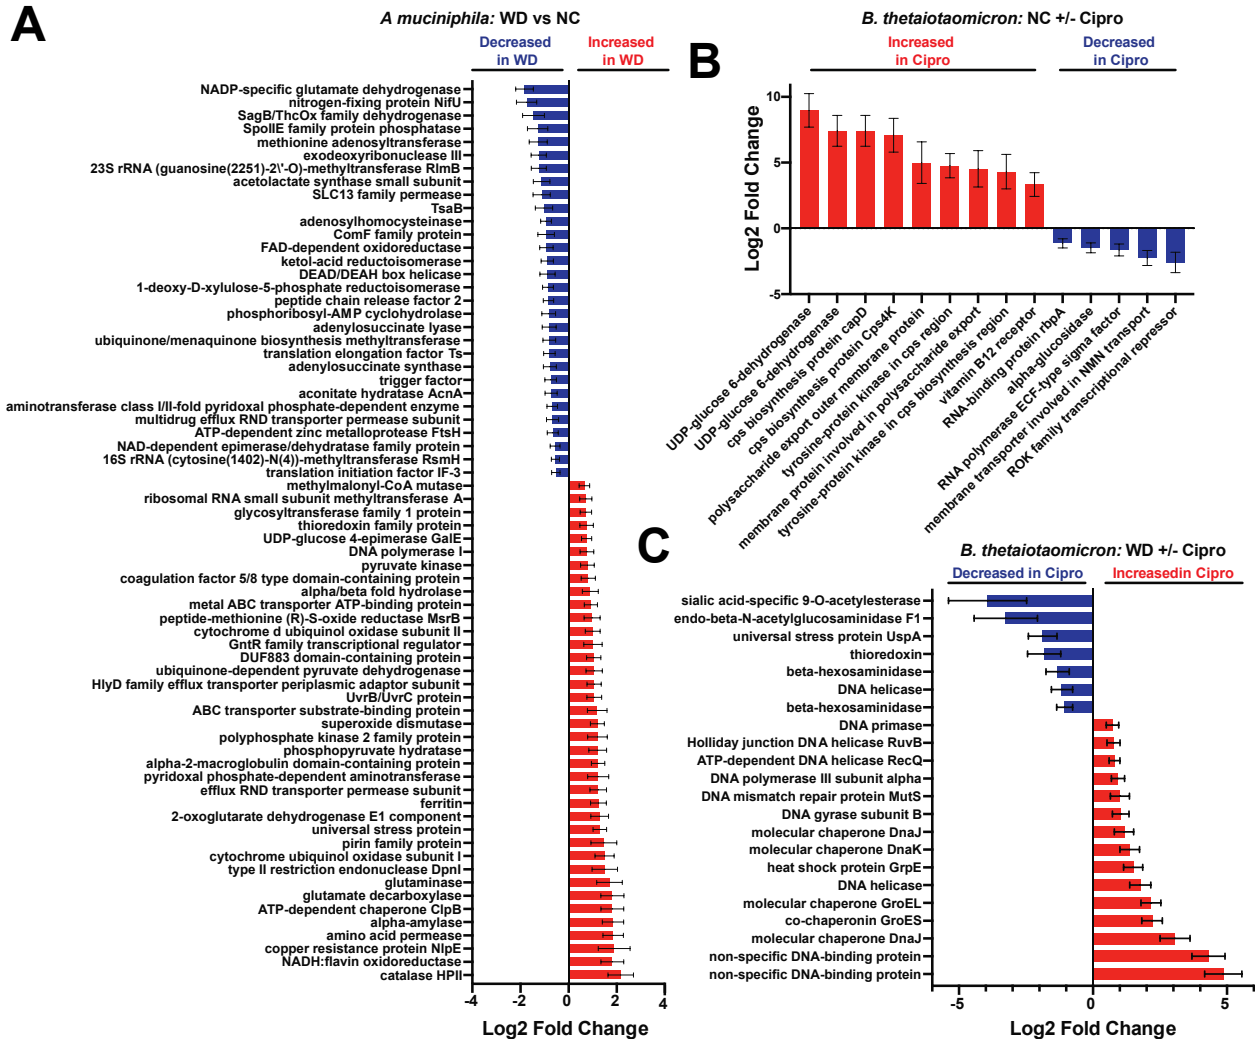

1052  
1053  
1054  
1055  
1056  
1057  
1058  
1059  
1060  
1061  
1062  
1063  
1064  
1065  
1066  
1067

**Figure 5:** Diet and ciprofloxacin alter gene expression within *B. thetaiotaomicron* and *A. muciniphila*

- Select differentially expressed (Benjamini-Hochberg adjusted p-value < 0.1) genes of interest in *A. muciniphila* within the cecum of vehicle-treated mice consuming the Western (WD) diet. Data are represented as log<sub>2</sub> fold change relative to control diet ± standard error. See Additional File 7 for full results.
- Select differentially expressed (Benjamini-Hochberg adjusted p-value < 0.1) genes of interest in *B. thetaiotaomicron* within the cecum of ciprofloxacin-treated mice consuming the control (NC) diet. Data are represented as log<sub>2</sub> fold change relative to control diet ± standard error. See Additional File 8 for full results.
- Select differentially expressed (Benjamini-Hochberg adjusted p-value < 0.1) genes of interest in *B. thetaiotaomicron* within the cecum of vehicle-treated mice consuming the Western (WD) diet. Data are represented as log<sub>2</sub> fold change relative to control diet ± standard error. See Additional File 8 for full results.

For all analyses, n = 4.

1068 **Additional Files:**

1069 **Additional File 1:** Full DESeq2 results of differential abundance testing of top 90 species detected  
1070 by shotgun metagenomics

1071 Table S1 – Differential abundance testing of the impact of Western diet (WD) consumption on the  
1072 abundance of the top 90 bacterial species detected in our dataset. Log<sub>2</sub> fold change values were  
1073 calculated relative to control diet samples.

1074 Table S2 – Differential abundance testing of the impact of ciprofloxacin treatment on the  
1075 abundance of the top 90 bacterial species in mice consuming the Western diet (WD). Log<sub>2</sub> fold  
1076 change values were calculated relative to vehicle-treated samples on the WD.

1077 Table S3 - Differential abundance testing of the impact of ciprofloxacin treatment on the  
1078 abundance of the top 90 bacterial species in mice consuming the control diet (NC). Log<sub>2</sub> fold  
1079 change values were calculated relative to vehicle-treated samples on the NC.

1080 Table S4 – Interaction term analysis generated by DESeq2 for the impact of host diet consumption  
1081 on changes in species abundance following ciprofloxacin therapy. Log<sub>2</sub> fold change values were  
1082 calculated relative to vehicle-treated samples on the NC.

1083  
1084 **Additional File 2:** Full LefSe results from the analysis of MetaCyc pathway abundance generated  
1085 by HUMAnN2. “Class” denotes the experimental group a particular pathway was associated with.

1086 Table S5 – LefSe analysis of all experimental groups.

1087 Table S6 – Pairwise LefSe analysis of vehicle-treated samples from mice consuming either the  
1088 Western (WD) or control (NC) diet.

1089 Table S7– Pairwise LefSe analysis of ciprofloxacin- and vehicle-treated samples from mice  
1090 consuming the control diet (NC)

1091 Table S8 – Pairwise LefSe analysis of ciprofloxacin- and vehicle-treated samples from mice  
1092 consuming the Western diet (WD)

1093  
1094 **Additional File 3:** Full DESeq2 results of SEED subsystem abundance generated by SAMSA2

1095 Table S9 – Differential abundance testing of the impact of Western diet (WD) consumption on the  
1096 abundance of SEED subsystems in the murine cecal metatranscriptome. Log<sub>2</sub> fold change values  
1097 were calculated relative to control diet samples.

1098 Table S10 – Differential abundance testing of the impact of ciprofloxacin treatment on the  
1099 abundance of SEED subsystems in the murine cecal metatranscriptome in animals consuming the  
1100 Western diet (WD). Log<sub>2</sub> fold change values were calculated relative to vehicle-treated samples  
1101 on the WD.

1102 Table S11 - Differential abundance testing of the impact of ciprofloxacin treatment on the  
1103 abundance of SEED subsystems in the murine cecal metatranscriptome in animals consuming the  
1104 control diet (NC). Log<sub>2</sub> fold change values were calculated relative to vehicle-treated samples on  
1105 the NC.

1106  
1107 **Additional File 4:** Full DESeq2 results of RefSeq transcript abundance generated by SAMSA2

1108 Table S12 – Differential abundance testing of the impact of Western diet (WD) consumption on  
1109 the abundance of RefSeq transcripts in the murine cecal metatranscriptome. Log<sub>2</sub> fold change  
1110 values were calculated relative to control diet samples.

1111 Table S13 – Differential abundance testing of the impact of ciprofloxacin treatment on the  
1112 abundance of RefSeq transcripts in the murine cecal metatranscriptome in animals consuming the

1113 Western diet (WD). Log<sub>2</sub> fold change values were calculated relative to vehicle-treated samples  
1114 on the WD.

1115 Table S14 - Differential abundance testing of the impact of ciprofloxacin treatment on the  
1116 abundance of RefSeq transcripts in the murine cecal metatranscriptome in animals consuming the  
1117 control diet (NC). Log<sub>2</sub> fold change values were calculated relative to vehicle-treated samples on  
1118 the NC.

1119 Table S15 – Interaction term analysis generated by DESeq2 for the impact of host diet  
1120 consumption on changes in RefSeq transcripts abundance following ciprofloxacin therapy. Log<sub>2</sub>  
1121 fold change values were calculated relative to vehicle-treated samples on the NC.  
1122

1123 **Additional File 5:** Full DESeq2 results of ARG class abundance generated by deepARG

1124 Table S16 – Differential abundance testing of the impact of Western diet (WD) consumption on  
1125 the abundance of ARG classes in the murine cecal metatranscriptome. Log<sub>2</sub> fold change values  
1126 were calculated relative to control diet samples.

1127 Table S17 – Differential abundance testing of the impact of ciprofloxacin treatment on the  
1128 abundance of ARG classes in the murine cecal metatranscriptome in animals consuming the  
1129 Western diet (WD). Log<sub>2</sub> fold change values were calculated relative to vehicle-treated samples  
1130 on the WD.

1131 Table S18 - Differential abundance testing of the impact of ciprofloxacin treatment on the  
1132 abundance of ARG classes in the murine cecal metatranscriptome in animals consuming the  
1133 control diet (NC). Log<sub>2</sub> fold change values were calculated relative to vehicle-treated samples on  
1134 the NC.

1135 Table S19 – Interaction term analysis generated by DESeq2 for the impact of host diet  
1136 consumption on changes in ARG class abundance following ciprofloxacin therapy. Log<sub>2</sub> fold  
1137 change values were calculated relative to vehicle-treated samples on the NC.  
1138

1139 **Additional File 6:** Full DESeq2 results of ARG transcript abundance generated by deepARG

1140 Table S16 – Differential abundance testing of the impact of Western diet (WD) consumption on  
1141 the abundance of ARG transcripts in the murine cecal metatranscriptome. Log<sub>2</sub> fold change values  
1142 were calculated relative to control diet samples.

1143 Table S17 – Differential abundance testing of the impact of ciprofloxacin treatment on the  
1144 abundance of ARG transcripts in the murine cecal metatranscriptome in animals consuming the  
1145 Western diet (WD). Log<sub>2</sub> fold change values were calculated relative to vehicle-treated samples  
1146 on the WD.

1147 Table S18 - Differential abundance testing of the impact of ciprofloxacin treatment on the  
1148 abundance of ARG transcripts in the murine cecal metatranscriptome in animals consuming the  
1149 control diet (NC). Log<sub>2</sub> fold change values were calculated relative to vehicle-treated samples on  
1150 the NC.

1151 Table S19 – Interaction term analysis generated by DESeq2 for the impact of host diet  
1152 consumption on changes in ARG transcript abundance following ciprofloxacin therapy. Log<sub>2</sub> fold  
1153 change values were calculated relative to vehicle-treated samples on the NC.  
1154

1155 **Additional File 7:** Full DESeq2 results of virulence factor (VF) transcript abundance generated  
1156 by alignment of reads to the Virulence Factor Database (VFDB) by SAMSA2

1157 Table S20 – Differential abundance testing of the impact of Western diet (WD) consumption on  
1158 the abundance of VF transcripts in the murine cecal metatranscriptome. Log<sub>2</sub> fold change values  
1159 were calculated relative to control diet samples.

1160 Table S21 – Differential abundance testing of the impact of ciprofloxacin treatment on the  
1161 abundance of VF transcripts in the murine cecal metatranscriptome in animals consuming the  
1162 Western diet (WD). Log<sub>2</sub> fold change values were calculated relative to vehicle-treated samples  
1163 on the WD.

1164 Table S22 - Differential abundance testing of the impact of ciprofloxacin treatment on the  
1165 abundance of VF transcripts in the murine cecal metatranscriptome in animals consuming the  
1166 control diet (NC). Log<sub>2</sub> fold change values were calculated relative to vehicle-treated samples on  
1167 the NC.

1168 Table S23 – Interaction term analysis generated by DESeq2 for the impact of host diet  
1169 consumption on changes in VF transcript abundance following ciprofloxacin therapy. Log<sub>2</sub> fold  
1170 change values were calculated relative to vehicle-treated samples on the NC.

1171  
1172 **Additional File 8:** Full DESeq2 results of transcript abundance analysis of *A. muciniphila* during  
1173 dietary intervention and ciprofloxacin treatment

1174 Table S24 – Differential abundance testing of the impact of Western diet (WD) consumption on  
1175 the abundance of *A. muciniphila* transcripts within the murine cecal metatranscriptome. Log<sub>2</sub> fold  
1176 change values were calculated relative to control diet samples.

1177 Table S25 – Differential abundance testing of the impact of ciprofloxacin treatment on the  
1178 abundance of *A. muciniphila* transcripts within the murine cecal metatranscriptome in animals  
1179 consuming the Western diet (WD). Log<sub>2</sub> fold change values were calculated relative to vehicle-  
1180 treated samples on the WD.

1181 Table S26 - Differential abundance testing of the impact of ciprofloxacin treatment on the  
1182 abundance of *A. muciniphila* transcripts within the murine cecal metatranscriptome in animals  
1183 consuming the control diet (NC). Log<sub>2</sub> fold change values were calculated relative to vehicle-  
1184 treated samples on the NC.

1185 Table S27 – Interaction term analysis generated by DESeq2 for the impact of host diet  
1186 consumption on changes in *A. muciniphila* transcript abundance following ciprofloxacin therapy.  
1187 Log<sub>2</sub> fold change values were calculated relative to vehicle-treated samples on the NC.

1188  
1189 **Additional File 9:** Full DESeq2 results of transcript abundance analysis of *B. thetaiotaomicron*  
1190 during dietary intervention and ciprofloxacin treatment

1191 Table S28 – Differential abundance testing of the impact of Western diet (WD) consumption on  
1192 the abundance of *B. thetaiotaomicron* transcripts within the murine cecal metatranscriptome. Log<sub>2</sub>  
1193 fold change values were calculated relative to control diet samples.

1194 Table S29 – Differential abundance testing of the impact of ciprofloxacin treatment on the  
1195 abundance of *B. thetaiotaomicron* transcripts within the murine cecal metatranscriptome in  
1196 animals consuming the Western diet (WD). Log<sub>2</sub> fold change values were calculated relative to  
1197 vehicle-treated samples on the WD.

1198 Table S30 - Differential abundance testing of the impact of ciprofloxacin treatment on the  
1199 abundance of *B. thetaiotaomicron* transcripts within the murine cecal metatranscriptome in  
1200 animals consuming the control diet (NC). Log<sub>2</sub> fold change values were calculated relative to  
1201 vehicle-treated samples on the NC.



1202 Table S31 – Interaction term analysis generated by DESeq2 for the impact of host diet  
1203 consumption on changes in *B. thetaiotaomicron* transcript abundance following ciprofloxacin  
1204 therapy. Log<sub>2</sub> fold change values were calculated relative to vehicle-treated samples on the NC.
